# Supplementary material for: Exploring organic photosensitizers based on hemicyanine derivatives: a sustainable approach for preparation of amide linkages
Source: Royal Society of Chemistry journal article supplement (doi:10.1039/c8ra06232c), 2018-01-01
Supplement: c8ra06232c1.pdf [file c8ra06232c1.pdf]

## Supplementary Information

# Exploring Organic Photosensitizers Based on Hemicyanine Derivatives: A Sustainable Approach for Preparation of Amide Linkages

*Harnimarta Deol, Manoj Kumar, Vandana Bhalla\**

Department of Chemistry, UGC Sponsored Centre for Advanced Studies-II

Guru Nanak Dev University, Amritsar 143005, and Punjab, India

[vanmanan@yahoo.co.in](mailto:vanmanan@yahoo.co.in)

### Table of Contents

**S3:** Comparison table of **C4** photocatalyst with off shelf photosensitizers for carrying out oxidative amidation of aldehydes.

**S4:** Uv-vis spectra of **C1**, **C2**, **C3** and **C4** in DMSO: H<sub>2</sub>O (1:1) solvent mixture.

**S4:** Fluorescence spectra of **C1**, **C2**, **C3** and **C4** in DMSO:H<sub>2</sub>O (1:1) solvent mixture.

**S5:** Fluorescence lifetime decay profile of **C1**.

**S5:** Fluorescence lifetime decay profile of **C2**.

**S6:** Fluorescence lifetime decay profile of **C3**.

**S6:** Fluorescence lifetime decay profile of **C4**.

**S7:** (a) Uv-vis spectra of DPBF in presence of **C1**. (b) Semilogarithmic plots for the absorption decays of DPBF (50μM) (lnA<sub>0</sub>/A) versus time .

**S7:** (a) Uv-vis spectra of DPBF in presence of **C4**. (b) Semilogarithmic plots for the absorption decays of DPBF (50μM) (lnA<sub>0</sub>/A) versus time.

**S8:** (A) UV-vis and (B) fluorescence spectra of derivative **C1** after irradiation of 36 h.

**S8:** (A) UV-vis and (B) fluorescence spectra of derivative **C2** after irradiation of 36 h.

**S9:** (A) UV-vis and (B) fluorescence spectra of derivative **C3** after irradiation of 36 h

**S9:** (A) UV-vis and (B) fluorescence spectra of derivative **C4** after irradiation of 36 h.

**S10:** Uv-vis spectra of methyl viologen in presence of **C1**.

**S10:** Uv-vis spectra of methyl viologen in presence of **C2**.

**S11:** Uv-vis spectra of methyl viologen in presence of **C3**.

**S11:** Fluorescence spectra of derivative **C4** upon addition of pyrrolidine in DMSO:Water.

**S12:** Fluorescence spectra of derivative **C1** upon addition of pyrrolidine in DMSO:Water.

**S12:** Fluorescence spectra of derivative **C2** upon addition of pyrrolidine in DMSO:Water.

**S13:** Fluorescence spectra of derivative **C3** upon addition of pyrrolidine in DMSO:Water.

**S13:** Oxidative amidation of nitrobenzaldehyde in presence of solar light using **C4** as photosensitizer under optimized conditions.

**S14:** Images showing the recovery of photocatalyst **C4** by usual work up.

**S14:** Reusability of **C4** for carrying out oxidative amidation of aromatic aldehydes under visible light irradiation..

**S15:** Whatman filter paper (b) coated with derivative **C4** by dip the whatman filter paper into solution of derivative **C4**.

**S15:** Test for detection of generation of  $H_2O_2$ .

**S18:**  $^1H$  NMR spectrum of **5a**.

**S19:**  $^1H$  NMR spectrum of **5b**.

**S20:**  $^1H$  NMR spectrum of **5c**.

**S21:**  $^1H$  NMR spectrum of **5d**.

**S22:**  $^1H$  NMR spectrum of **5e**.

**S23:**  $^1H$  NMR spectrum of **7a**.

**S24:**  $^1H$  NMR spectrum of **7b**.

**S25:**  $^1H$  NMR spectrum of **7c**.

**S26:**  $^1H$  NMR spectrum of **7d**.

**S27:**  $^1H$  NMR spectrum of **7e**.

**S28:**  $^1H$  NMR spectrum of **8a**.

**S29:**  $^1H$  NMR spectrum of **8b**.

**S30:**  $^1H$  NMR spectrum of **C2**.

**S31:**  $^{13}C$  NMR spectrum of **C2**.

**S32:** Mass spectrum of **C2**.

**S33:**  $^1H$  NMR spectrum of **C3**.

**S34:**  $^{13}C$  NMR spectrum of **C3**.

**S35:** Mass spectrum of **C3**.

**S36:**  $^1H$  NMR spectrum of **C4**.

**S37:** Mass spectrum of **C4**.

**Table S1. Comparison of C4 photocatalyst with off shelf photosensitizer for carrying out oxidative amidation of aldehydes.**

| <b>Photocatalysts</b>                                 | <b>Solvent</b>                       | <b>Time</b> | <b>Additive</b> | <b>Reuseability/<br/>Recyclability</b> | <b>Yield</b> |
|-------------------------------------------------------|--------------------------------------|-------------|-----------------|----------------------------------------|--------------|
| <b>C4<br/>(This Work)</b>                             | <b>DMSO:H<sub>2</sub>O<br/>(1:1)</b> | <b>12h</b>  | -               | <b>Yes</b>                             | <b>82%</b>   |
| Phenazine<br>ethosulfate                              | MeCN                                 | 12h         | -               | No                                     | 41%          |
| Ru(bpy) <sub>3</sub> Cl <sub>2</sub>                  | MeCN                                 | 12h         | -               | No                                     | 37%          |
| Ru(phen) <sub>3</sub> Cl <sub>2</sub>                 | MeCN                                 | 12h         | -               | No                                     | 46%          |
| Ru(phen) <sub>3</sub> (PF <sub>6</sub> ) <sub>2</sub> | MeCN                                 | 12h         | -               | No                                     | 42%          |
| Ir(dtbpy)(ppy) <sub>2</sub> PF <sub>6</sub>           | MeCN                                 | 12h         | -               | No                                     | 44%          |
| Nile red                                              | MeCN                                 | 12h         | -               | No                                     | 29%          |
| Rhodamine B                                           | MeCN                                 | 12h         | -               | No                                     | 26%          |
| Alizarin red S                                        | MeCN                                 | 12h         | -               | No                                     | 22%          |
| Methylene blue                                        | MeCN                                 | 12h         | -               | No                                     | 16%          |

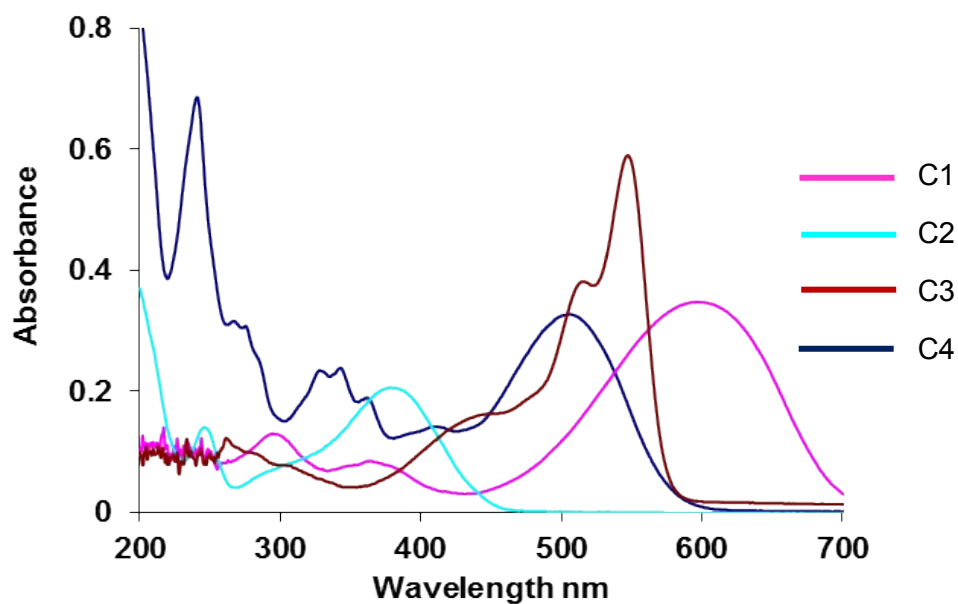

Fig. S1. Uv-vis spectra of C1, C2, C3 and C4 in DMSO: H<sub>2</sub>O (1:1) solvent mixture.

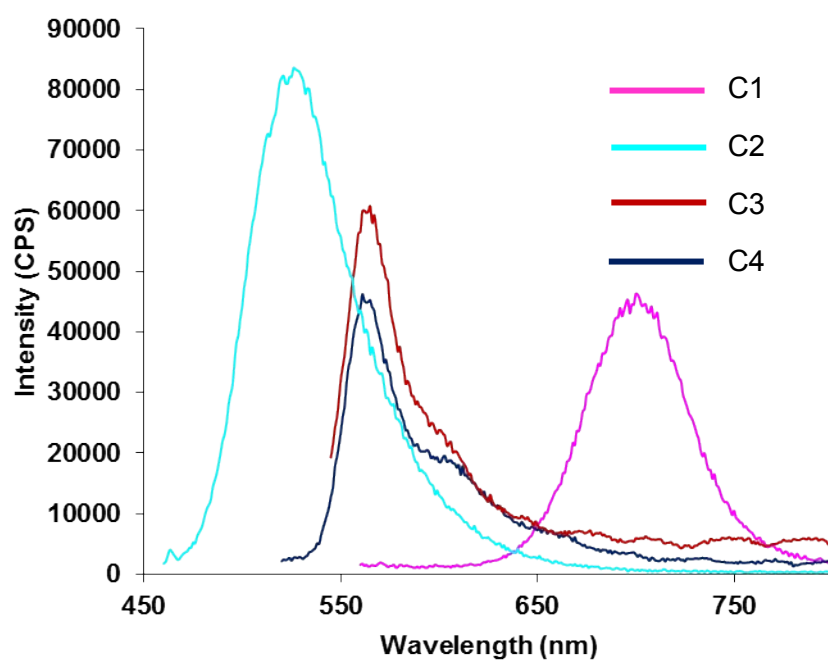

Fig. S2. Fluorescence spectra of C1, C2, C3 and C4 in DMSO:H<sub>2</sub>O (1:1) solvent mixture.

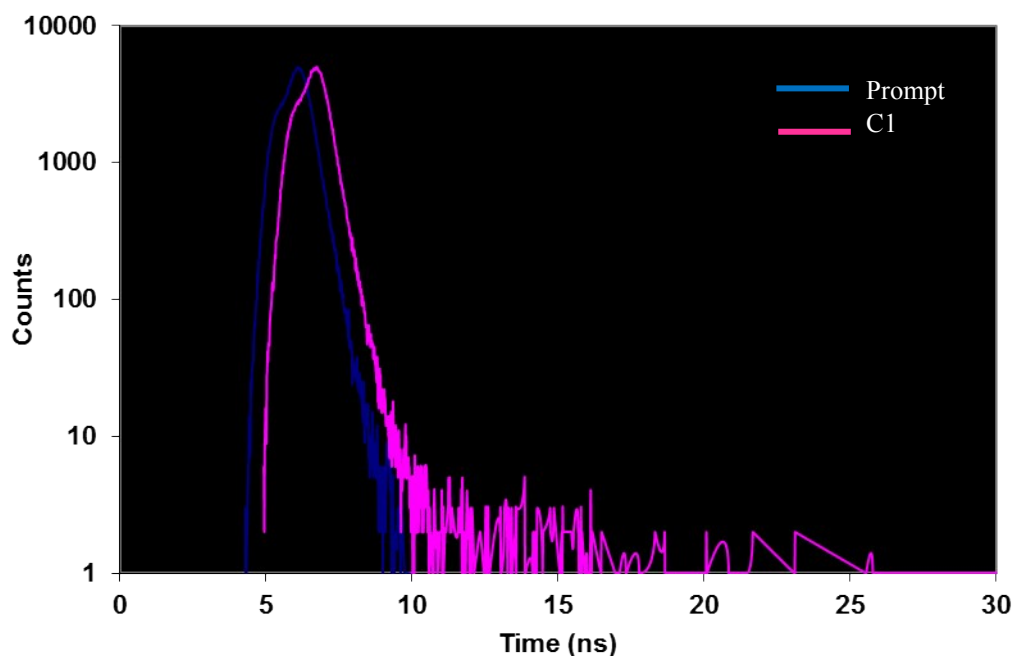

**Fig. S3** Fluorescence lifetime decay profiles of **C1** in H<sub>2</sub>O: DMSO (1:1, v/v). IRF = instrument response function.  $\lambda_{\text{ex}}$  = 635 nm and emission spectra are recorded at 686 nm with 32 slit width.

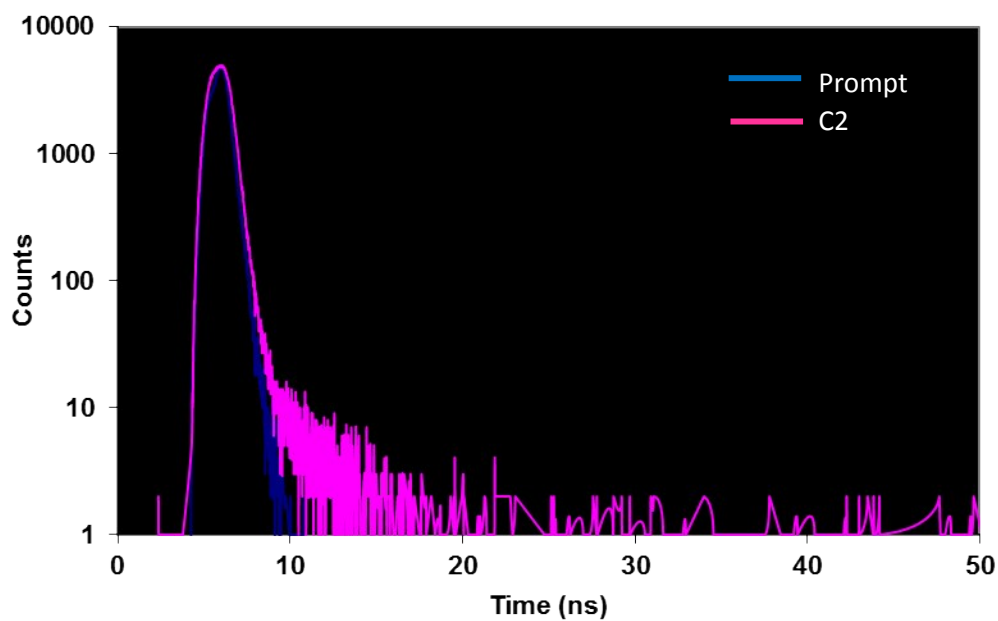

**Fig. S4** Fluorescence lifetime decay profiles of **C2** in H<sub>2</sub>O: DMSO (1:1, v/v). IRF = instrument response function.  $\lambda_{\text{ex}}$  = 485 nm and emission spectra are recorded at 511 nm with 32 slit width.

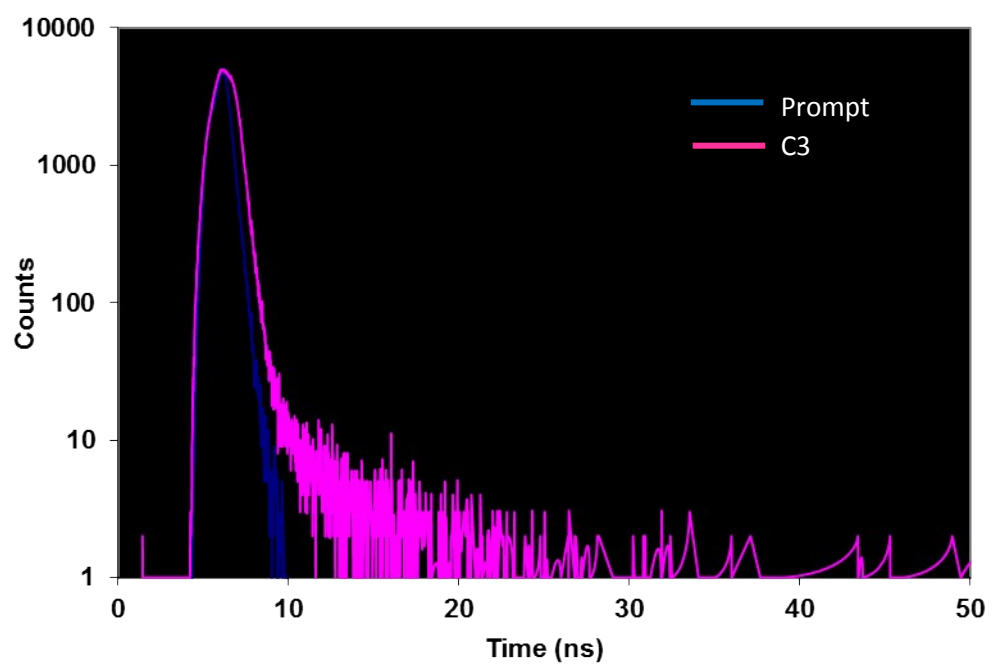

**Fig. S5** Fluorescence lifetime decay profiles of **C3** in H<sub>2</sub>O: DMSO (1:1, v/v). IRF = instrument response function.  $\lambda_{\text{ex}}$  = 485 nm and emission spectra are recorded at 557 nm with 32 slit width.

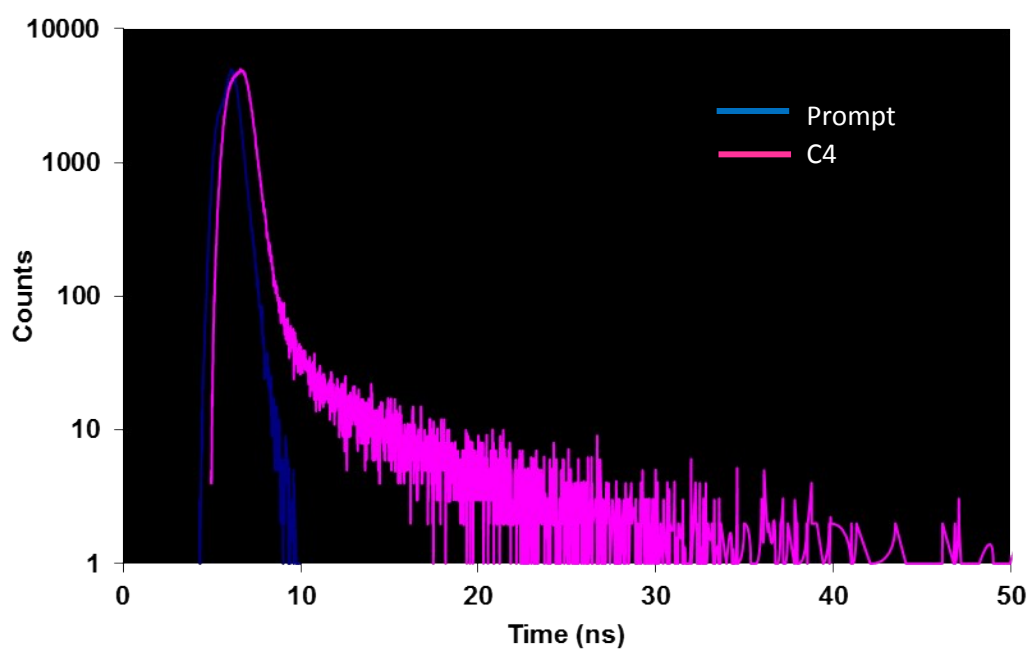

**Fig. S6** Fluorescence lifetime decay profiles of **C4** in H<sub>2</sub>O: DMSO (1:1, v/v). IRF = instrument response function.  $\lambda_{\text{ex}}$  = 485 nm and emission spectra are recorded at 616 nm with 32 slit width.

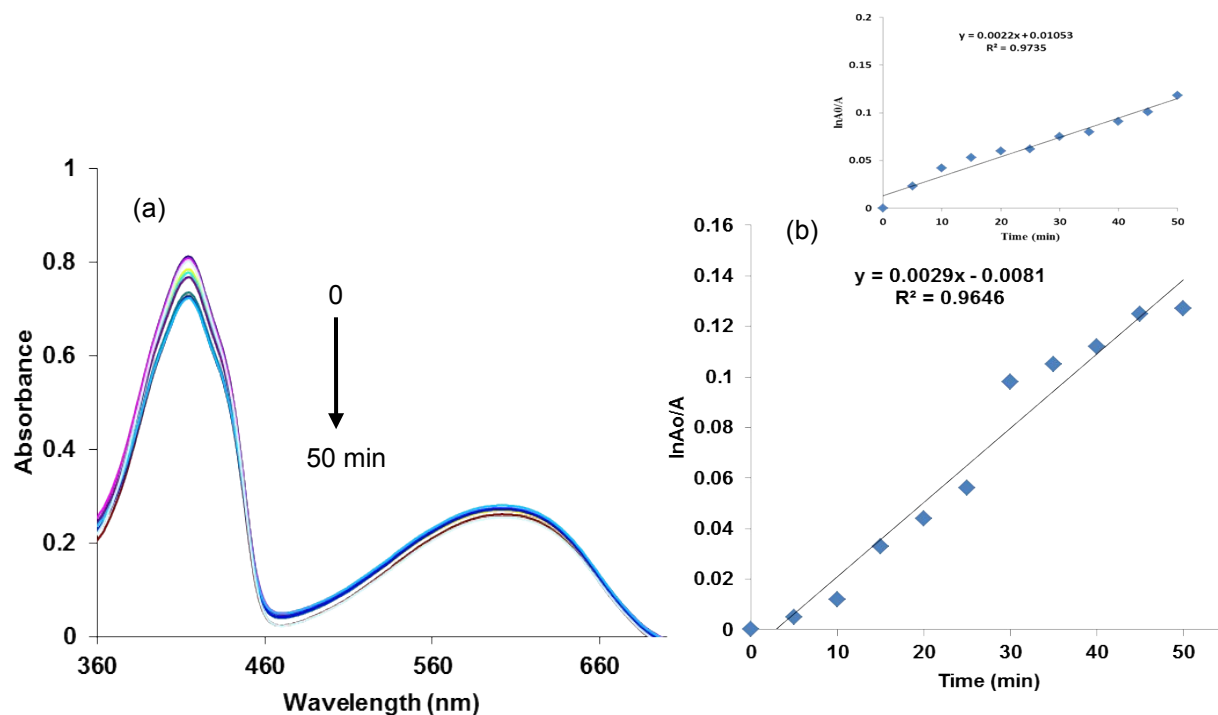

**Fig. S7** (a) Decrease in absorption maxima of DPBF (50 $\mu$ M) at 418 nm in DMSO under illumination in the presence of 5 $\mu$ M **C1** for 50 min after the solution was saturated with air oxygen. (b) Semilogarithmic plots for the absorption decays of DPBF (50 $\mu$ M) ( $\ln A_0/A$ ) versus time at the same experimental conditions. inset: shows semilogarithmic plots for reference dye methylene blue under same conditions.

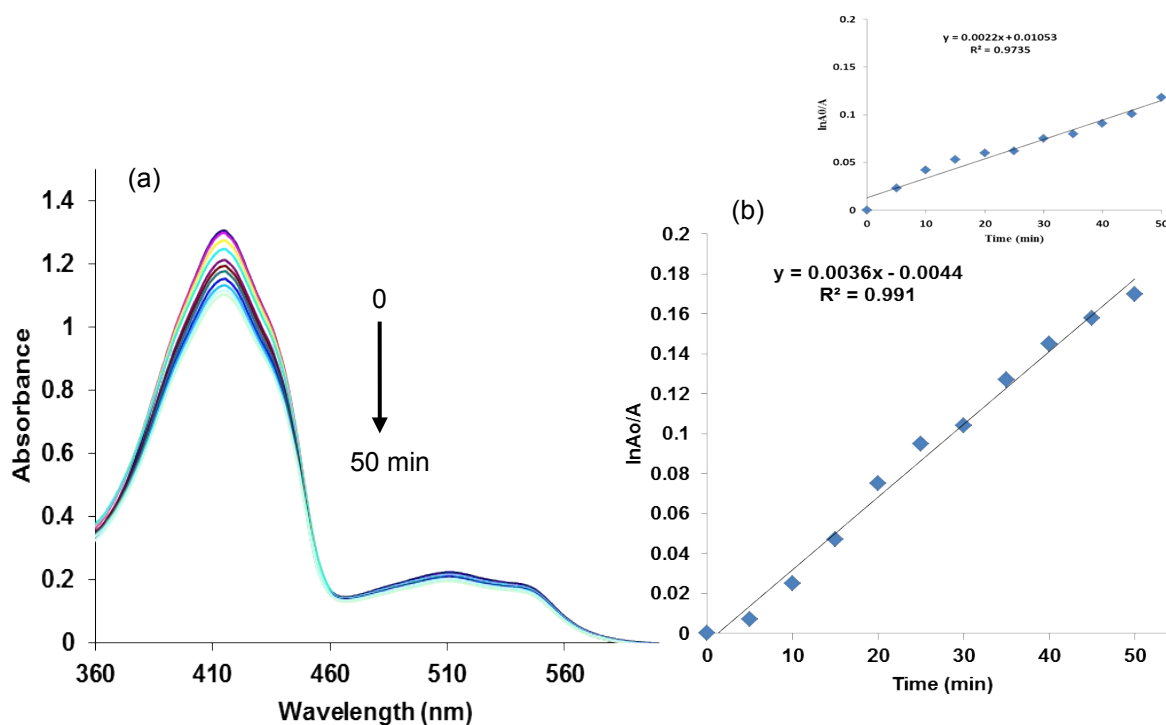

**Fig. S8** (a) Decrease in absorption maxima of DPBF (50 $\mu$ M) at 418 nm in DMSO under illumination in the presence of 5 $\mu$ M **C4** for 50 min after the solution was saturated with an air oxygen. (b) Semilogarithmic plots for the absorption decays of DPBF (50 $\mu$ M) ( $\ln A_0/A$ ) versus time at the same experimental conditions. inset: shows semilogarithmic plots for reference dye methylene blue under same conditions.

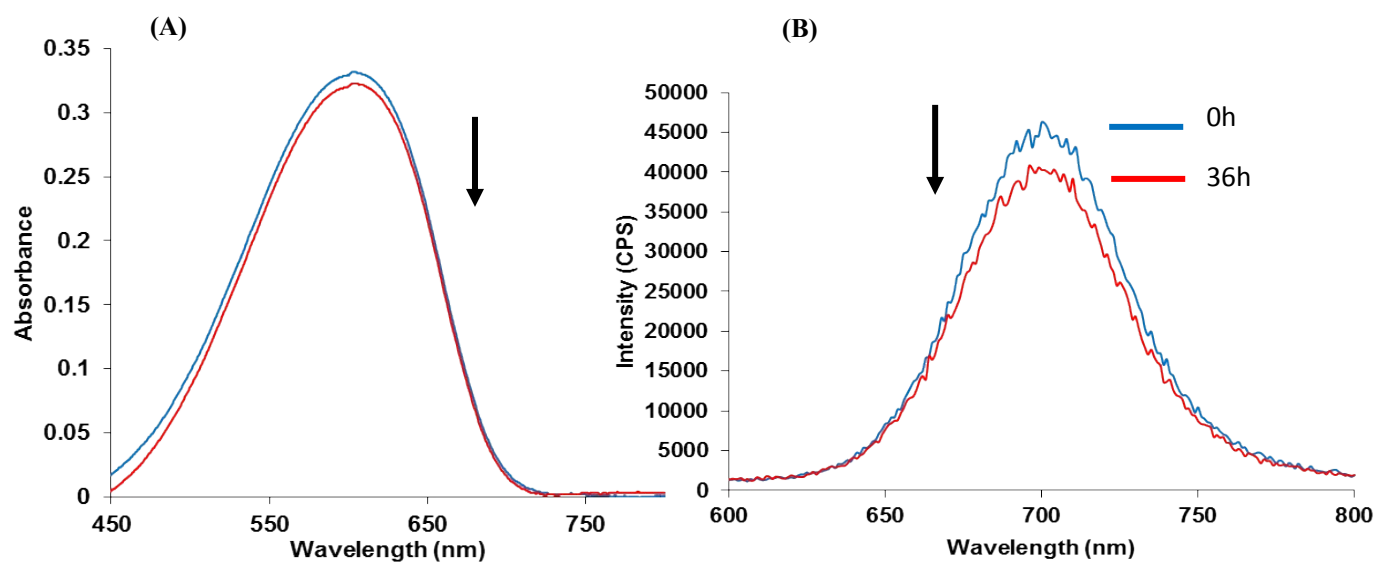

Fig. S9 (A) UV-vis and (B) fluorescence spectra of derivative C1 after irradiation of 36h.

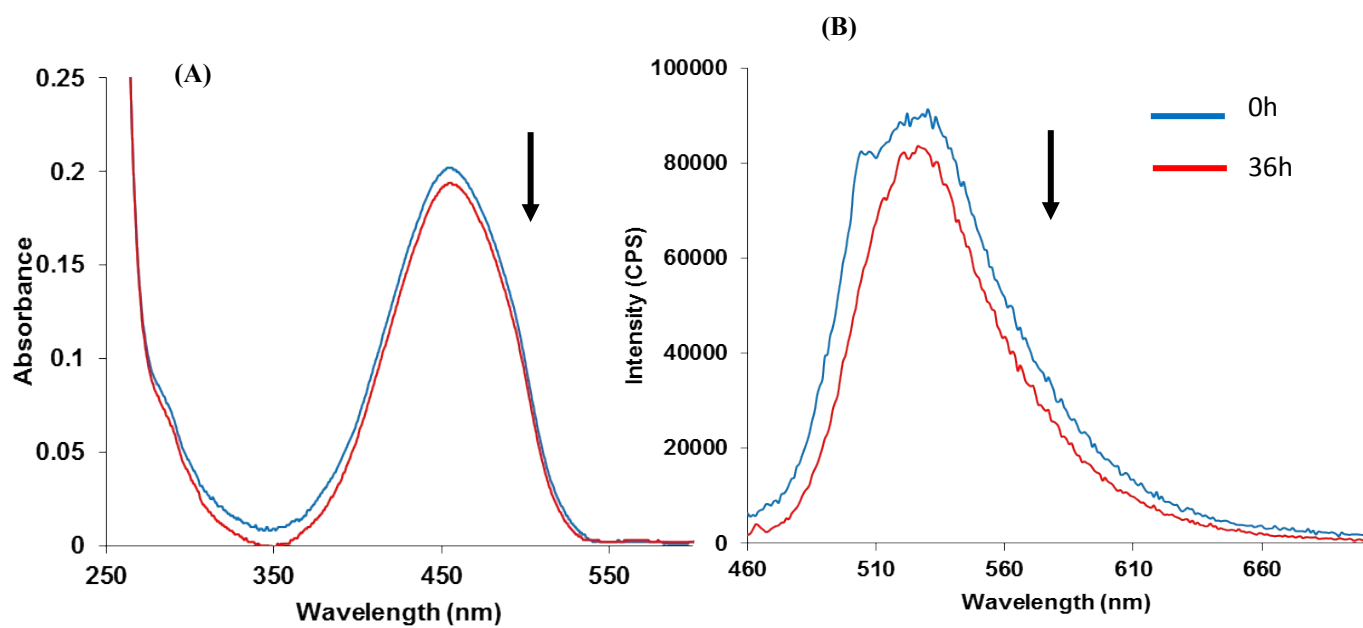

Fig. S10 (A) UV-vis and (B) fluorescence spectra of derivative C2 after irradiation of 36h.



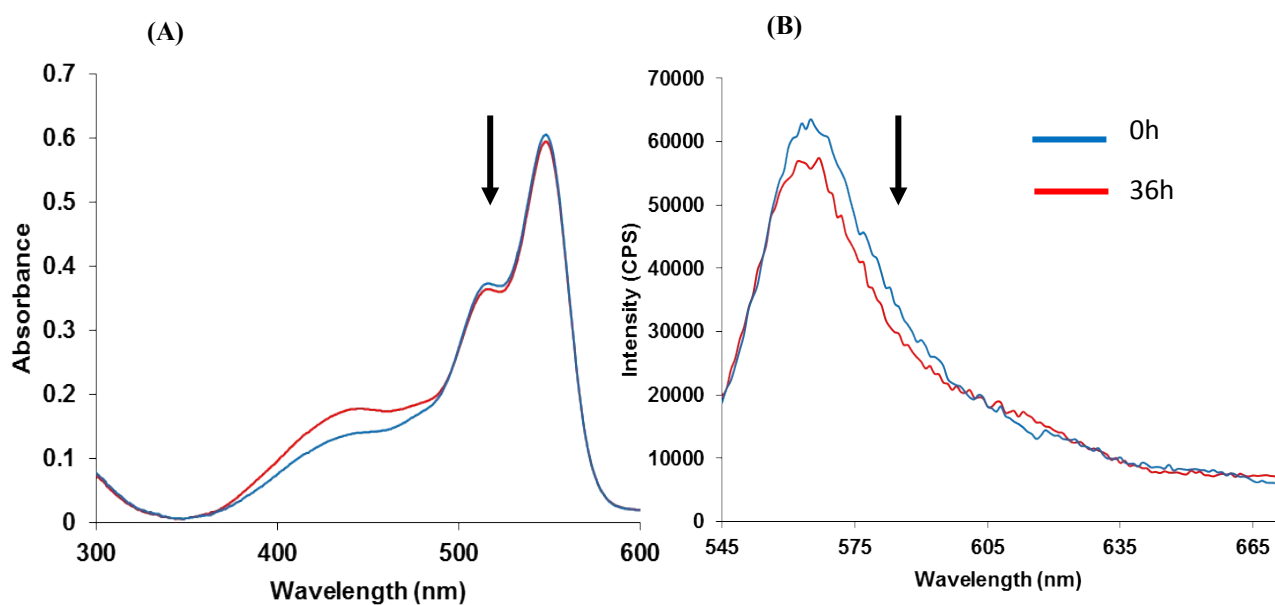

**Fig. S11** (A) UV-vis and (B) fluorescence spectra of derivative C3 after irradiation of 36h.

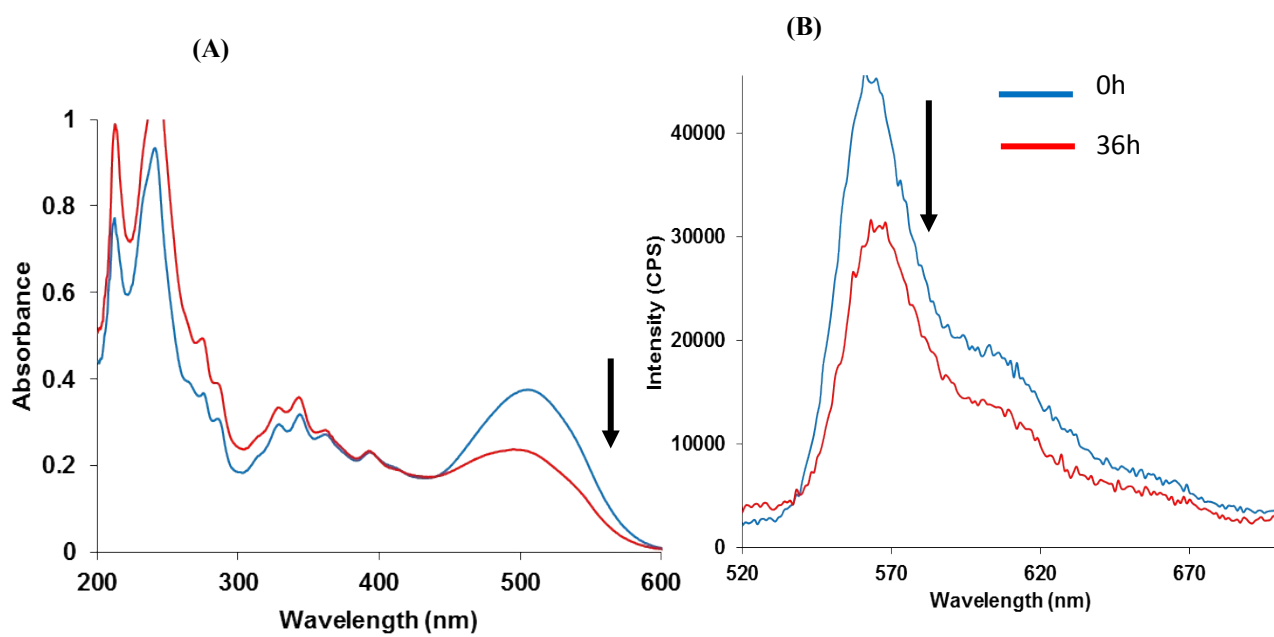

**Fig. S12** (A) Uv-vis and (B) fluorescence spectra of derivative C1 after irradiation of 36h.

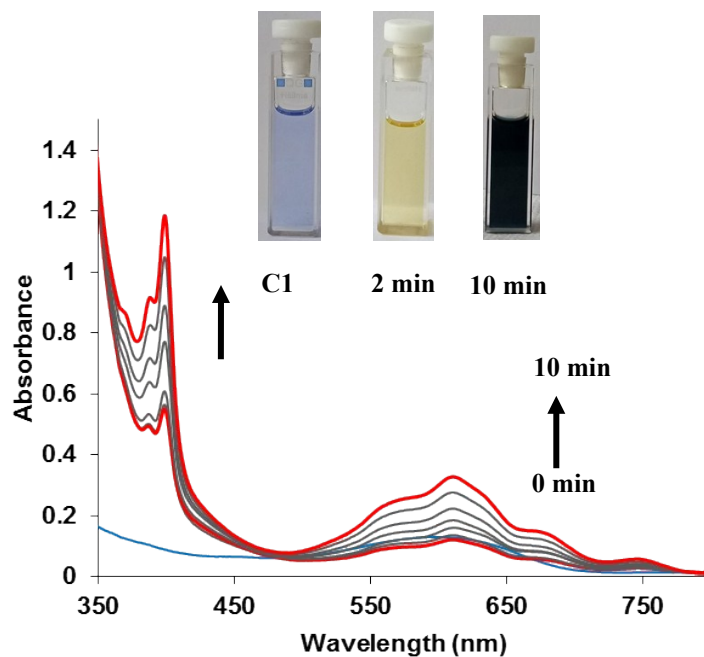

**Fig. S13** Absorption spectral changes of derivative **C1** (0.02 mM) in presence of MV<sup>2+</sup> (0.2 mM) and TEOA (50 mM) in DMSO under room light and inert atmosphere. inset: Photograph of solution before and after 10 min.

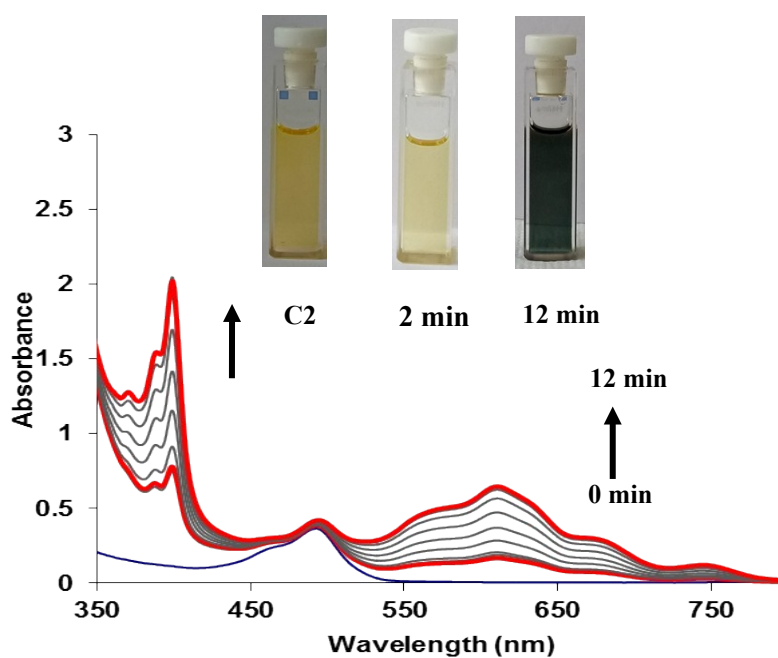

**Fig. S14** Absorption spectral changes of derivative **C2** (0.02 mM) in presence of MV<sup>2+</sup> (0.2 mM) and TEOA (50 mM) in DMSO under room light and inert atmosphere. inset: Photograph of solution before and after 12 min.

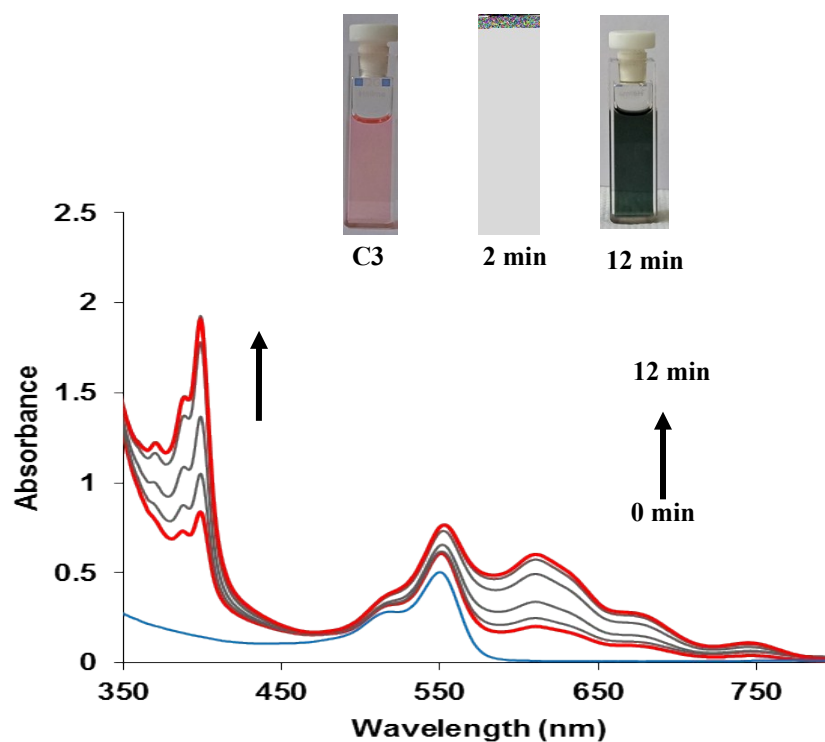

**Fig. S15** Absorption spectral changes of derivative **C3** (0.02 mM) in presence of MV<sup>2+</sup> (0.2 mM) and TEOA (50 mM) in DMSO under room light and inert atmosphere. inset: Photograph of solution before and after 12 min.

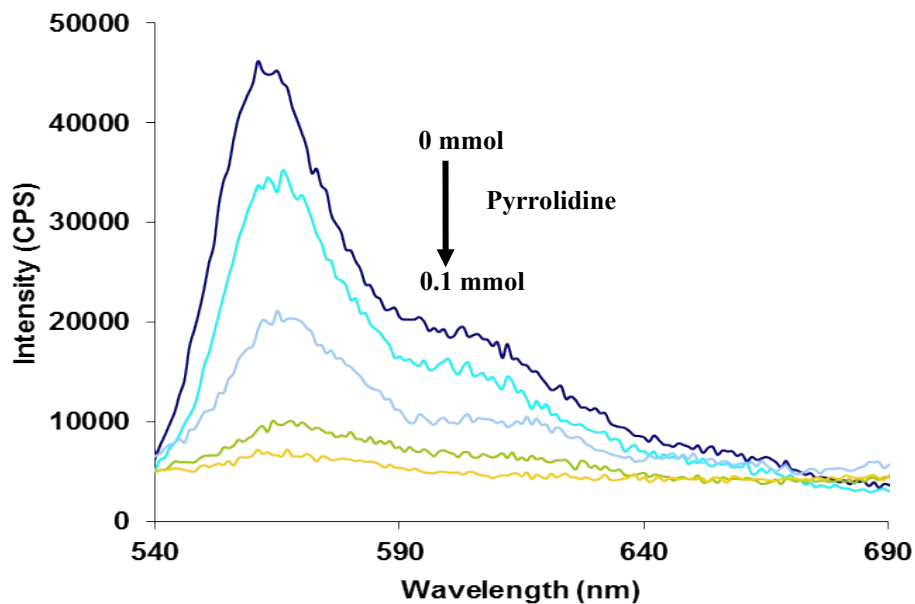

**Fig. S16** Fluorescence spectra of derivative **C4** (5 μM) upon addition of pyrrolidine (0.1 mmol) in DMSO:Water (1:1).

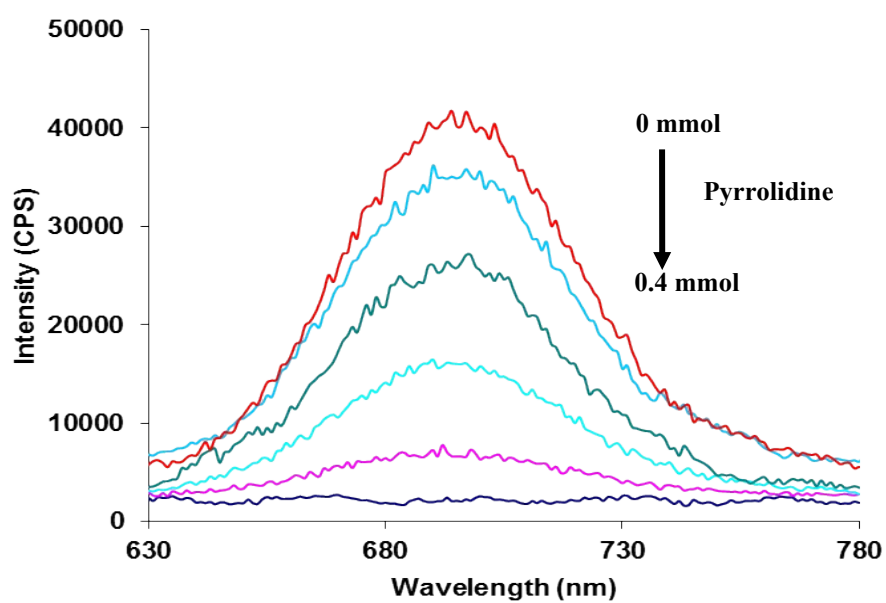

**Fig. S17** Fluorescence spectra of derivative C1 (5 μM) upon addition of pyrrolidine (0.4 mmol) in DMSO:Water (1:1).

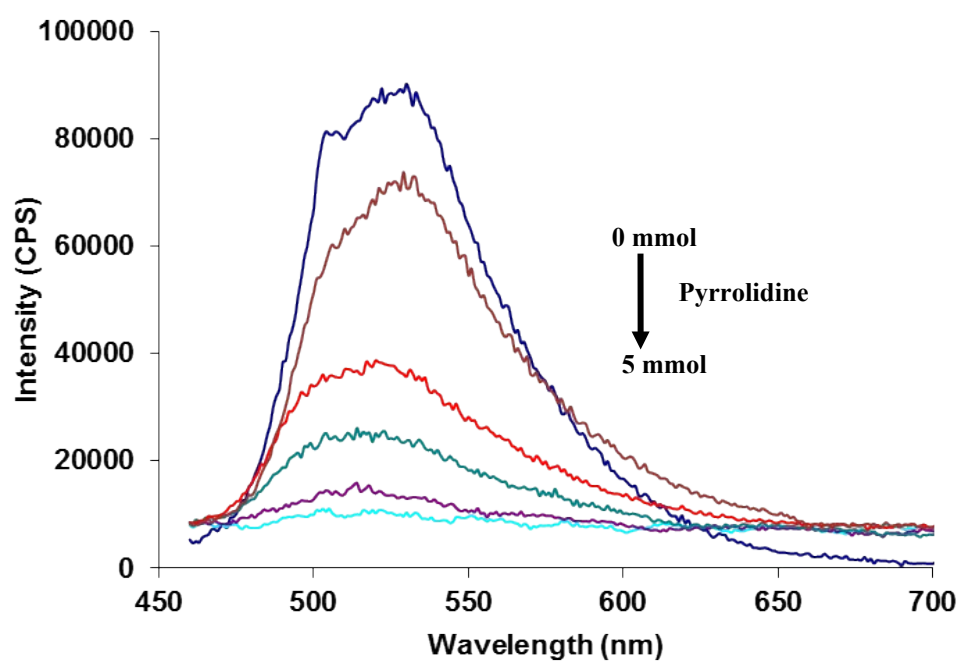

**Fig. S18** Fluorescence spectra of derivative C2 (5 μM) upon addition of pyrrolidine (5 mmol) in DMSO:Water (1:1).

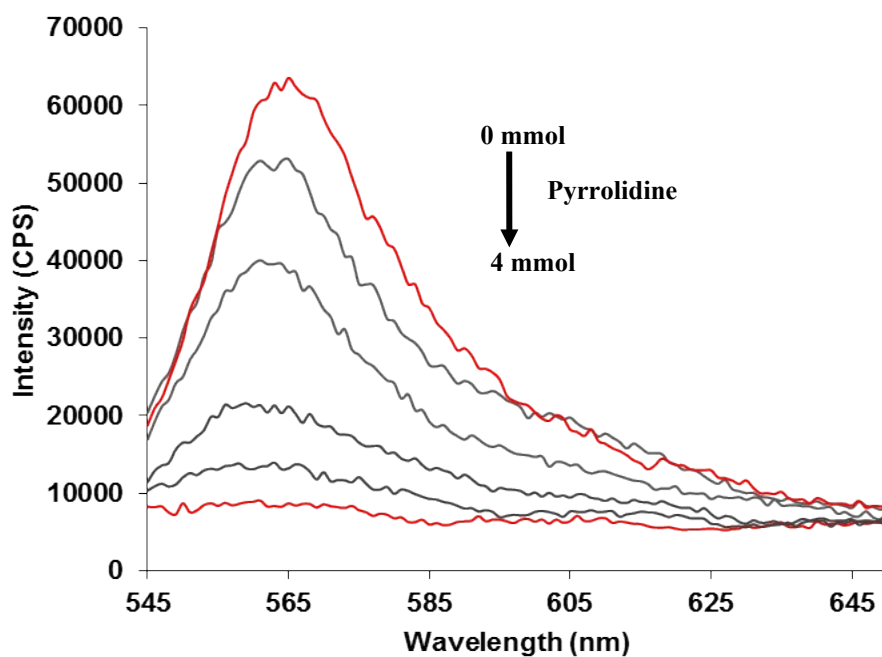

**Fig. S19** Fluorescence spectra of derivative **C3** (5 μM) upon addition of pyrrolidine (4 mmol) in DMSO:Water (1:1).

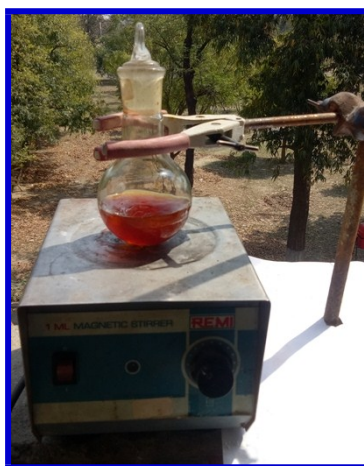

**Fig. S20** Oxidative amidation of nitrobenzaldehyde in presence of solar light using **C4** as photosensitizer under optimized conditions.

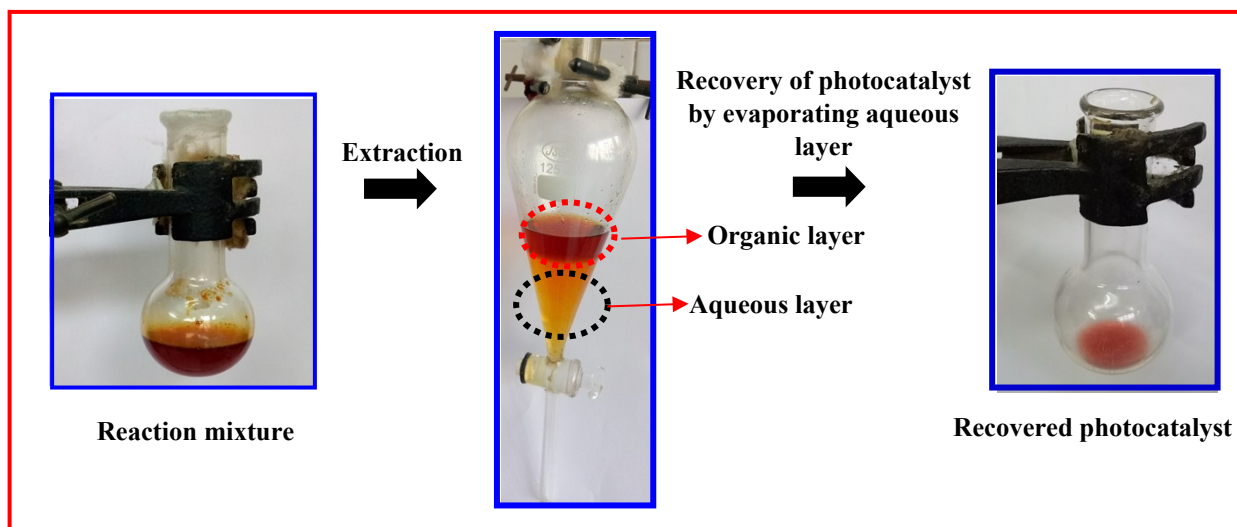

**Fig. S21** Images showing the recovery of photocatalyst **C4** by usual work up.

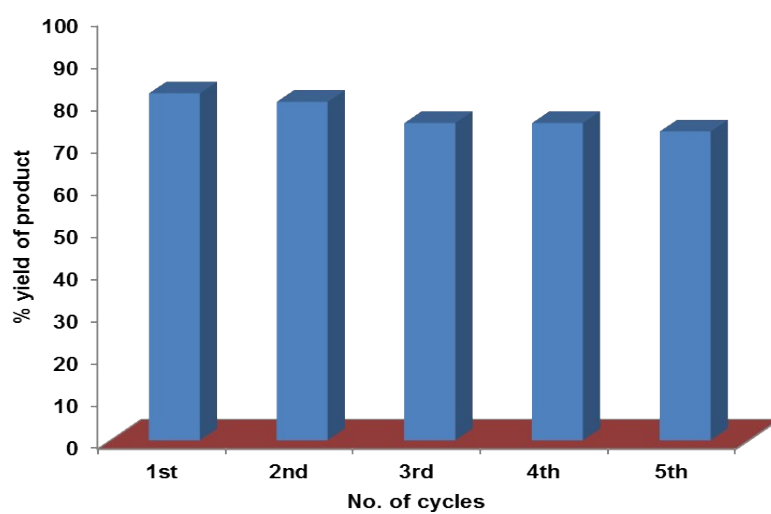

**Fig. S22** Reusability of **C4** for carrying out oxidative amidation of aromatic aldehydes under visible light irradiation.

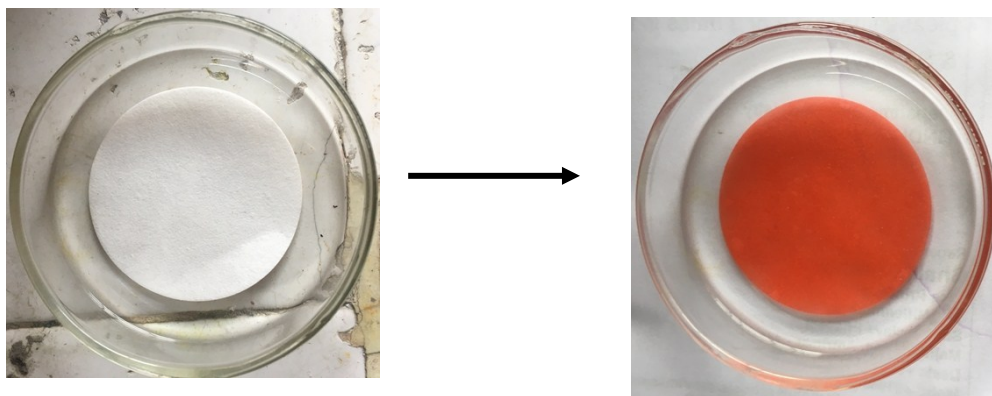

**Fig. S23** (a) Whatman filter paper (b) coated with derivative C4 by dip the whatman filter paper into solution of derivative C4 ( $5\ \mu\text{M}$ ).

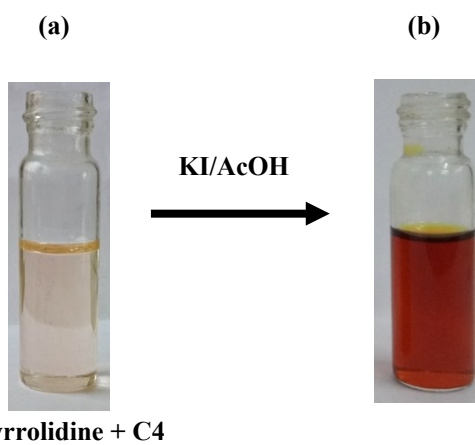

**Fig. S24** (a) Reaction mixture of pyrrolidine (0.75 mmol) and C4 (1 mol%) after irradiation of 8 h; (b) After addition of mixture KI ( $1.0 \times 10^{-1}\ \text{M}$ ), aqueous acetic acid ( $1.0 \times 10^{-1}\ \text{M}$ ) colour of solution changes to brown.

**(4-nitrophenyl)(pyrrolidin-1-yl)methanone<sup>1</sup>, 5a**

<sup>1</sup>H NMR (300 MHz, CDCl<sub>3</sub>): δ (ppm) = 8.27 (d, *J* = 9 Hz, 2H, Ar-H), 7.68 (d, *J* = 9 Hz, 2H, Ar-H), 3.66 (t, *J* = 6 Hz, 2H, CH<sub>2</sub>), 3.38 (t, *J* = 6 Hz, 2H, CH<sub>2</sub>), 2.01-1.90 (m, 4H, CH<sub>2</sub>).

**(4-methoxyphenyl)(pyrrolidin-1-yl)methanone<sup>2</sup>, 5b**

<sup>1</sup>H NMR (300 MHz, CDCl<sub>3</sub>): δ (ppm) = 7.51 (d, *J* = 6 Hz, 2H, Ar-H), 6.92 (d, *J* = 6 Hz, 2H, Ar-H), 3.83 (s, 3H, OCH<sub>3</sub>), 3.63 (t, *J* = 6 Hz, 2H, CH<sub>2</sub>), 3.48 (t, *J* = 9 Hz, 2H, CH<sub>2</sub>), 1.94-1.86 (m, 4H, CH<sub>2</sub>).

**Phenyl(pyrrolidin-1-yl)methanone<sup>1</sup>, 5c**

<sup>1</sup>H NMR (500 MHz, CDCl<sub>3</sub>): δ (ppm) = 7.51-7.50 (m, 2H, Ar-H), 7.40-7.38 (m, 3H, Ar-H), 3.64 (t, *J* = 7.5 Hz, 2H, CH<sub>2</sub>), 3.42 (t, *J* = 7.5 Hz, 2H, CH<sub>2</sub>), 1.98-1.93 (m, 2H, CH<sub>2</sub>), 1.89-1.84 (m, 2H, CH<sub>2</sub>).

**(4-cyanophenyl)(pyrrolidin-1-yl)methanone<sup>1</sup>, 5d**

<sup>1</sup>H NMR (500 MHz, CDCl<sub>3</sub>): δ (ppm) = 7.68 (d, *J* = 10 Hz, 2H, Ar-H), 7.59 (d, *J* = 10 Hz, 2H, Ar-H), 3.62 (t, *J* = 7.5 Hz, 2H, CH<sub>2</sub>), 3.35 (t, *J* = 7.5 Hz, 2H, CH<sub>2</sub>), 1.98-1.93 (m, 2H, CH<sub>2</sub>), 1.91-1.86 (m, 2H, CH<sub>2</sub>).

**(4-chlorophenyl)(pyrrolidin-1-yl)methanone<sup>1</sup>, 5e**

<sup>1</sup>H NMR (300 MHz, CDCl<sub>3</sub>): δ (ppm) = 7.43 (d, *J* = 6 Hz, 2H, Ar-H), 7.33 (d, *J* = 6 Hz, 2H, Ar-H), 3.59 (t, *J* = 6 Hz, 2H, CH<sub>2</sub>), 3.37 (t, *J* = 6 Hz, 2H, CH<sub>2</sub>), 1.94-1.82 (m, 4H, CH<sub>2</sub>).

**(4-nitrophenyl)(piperidin-1-yl)methanone<sup>3</sup>, 7a**

<sup>1</sup>H NMR (400 MHz, CDCl<sub>3</sub>): δ (ppm) = 8.27 (d, *J* = 8 Hz, 2H, Ar-H), 7.55 (d, *J* = 8 Hz, 2H, Ar-H), 3.73 (bs, 2H, CH<sub>2</sub>), 3.28 (bs, 2H, CH<sub>2</sub>), 1.79-1.52 (m, 6H, CH<sub>2</sub>).

**(4-methoxyphenyl)(piperidin-1-yl)methanone<sup>2</sup>, 7b**

<sup>1</sup>H NMR (300 MHz, CDCl<sub>3</sub>): δ (ppm) = 7.37 (d, *J* = 9 Hz, 2H, Ar-H), 6.90 (d, *J* = 9 Hz, 2H, Ar-H), 3.83 (s, 3H, OCH<sub>3</sub>), 3.64 (br, 2H, CH<sub>2</sub>), 3.44 (br, 2H, CH<sub>2</sub>), 1.66-1.58 (m, 6H, CH<sub>2</sub>).

**Phenyl (piperidin-1-yl)methanone, 7c**

<sup>1</sup>H NMR (300 MHz, CDCl<sub>3</sub>): δ (ppm) = 7.37 (m, 5H, Ar-H), 3.69 (br, 2H, CH<sub>2</sub>), 3.33 (br, 2H, CH<sub>2</sub>), 1.66-1.51 (m, 6H, CH<sub>2</sub>).

**(4-cyanophenyl)(piperidin-1-yl)methanone<sup>1</sup>, 7d**

<sup>1</sup>H NMR (300 MHz, CDCl<sub>3</sub>): δ (ppm) = 7.70 (d, *J* = 6 Hz, 2H, Ar-H), 7.48 (d, *J* = 6 Hz, 2H, Ar-H), 3.71 (br, 2H, CH<sub>2</sub>), 3.27 (br, 2H, CH<sub>2</sub>), 1.60 (bs, 4H, CH<sub>2</sub>), 1.53 (br, 2H, CH<sub>2</sub>).

**(4-chlorophenyl)(piperidin-1-yl)methanone<sup>2</sup>, 7e**



<sup>1</sup>H NMR (500 MHz, CDCl<sub>3</sub>): δ (ppm) = 7.38-7.32 (m, 4H, Ar-H), 3.69 (bs, 2H, CH<sub>2</sub>), 3.33 (bs, 2H, CH<sub>2</sub>), 1.68-1.51 (m, 6H, CH<sub>2</sub>).

**morpholino(4-nitrophenyl)methanone<sup>2</sup>, 8a**

<sup>1</sup>H NMR (400 MHz, CDCl<sub>3</sub>): δ (ppm) = 8.27 (d, *J* = 8 Hz, 2H, Ar-H), 7.57 (d, *J* = 8 Hz, 2H, Ar-H), 3.79-3.37 (m, 8H, CH<sub>2</sub>).

**morpholino(4-methoxyphenyl)methanone<sup>2</sup>, 8b**

<sup>1</sup>H NMR (300 MHz, CDCl<sub>3</sub>): δ (ppm) = 7.28 (d, *J* = 9 Hz, 2H, Ar-H), 6.82 (d, *J* = 9 Hz, 2H, Ar-H), 3.72 (s, 3H, OCH<sub>3</sub>), 3.60 (br, 8H, CH<sub>2</sub>).

**Derivative C3.**

<sup>1</sup>H NMR (DMSO-*d*<sub>6</sub>, 400 MHz, ): δ (ppm) = 10.02 (s, 1H), 8.35 (d, *J* = 6 Hz, 1H), 8.12 (d, *J* = 8 Hz, 2H), 7.83 (d, *J* = 8 Hz, 2H), 7.62-7.50 (m, 2H), 7.45 (d, *J* = 16 Hz, 2H), 6.95 (d, *J* = 8 Hz, 2H), 4.07 (s, 3H), 1.76 (s, 6H), <sup>13</sup>C NMR (DMSO-*d*<sub>6</sub>, 125 MHz) δ = 163.69, 154.24, 143.65, 142.33, 134.02, 129.32, 126.46, 123.23, 116.99, 115.11, 109.76, 52.20, 34.97, 26.14; MS (ESI): *m/z* 278.16 [M]<sup>+</sup>.

**Derivative C4.**

<sup>1</sup>H NMR (DMSO-*d*<sub>6</sub>, 400 MHz): δ (ppm) = 9.27 (d, *J* = 16 Hz, 1H), 8.99 (d, *J* = 8 Hz, 1H), 8.74 (d, *J* = 8 Hz, 1H), 8.49-8.38 (m, 5H), 8.30 (d, *J* = 8 Hz, 1H), 8.19-8.14 (m, 1H), 7.98-7.90 (m, 3H), 7.65-7.63 (m, 2H), 4.24 (s, 3H), 1.91 (s, 6H), MS (ESI): *m/z* 386.48 [M+1]<sup>+</sup>.

References

1. X.-F. Wang, S.-S. Yu, C. Wang, D. Xue and J. Xiao, *Org. Biomol. Chem.*, 2016, **14**, 7028.
2. K. Ekoue-Kovi and C. Wolf, *Org. Lett.*, 2007, **9**, 3429.
3. Y.-C. Hsu, V. C.-C. Wang, K.-C. A. Yeung, C.-Y. Tsai, C.-C. Chang, B.-C. Lin, Y.-T. Chan, C.-P. Hsu, G. P. A. Yap, T. Jurca and T.-G. Ong, *Angew. Chem. Int. Ed.*, 2018, **57**, 4622.

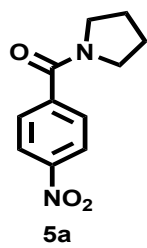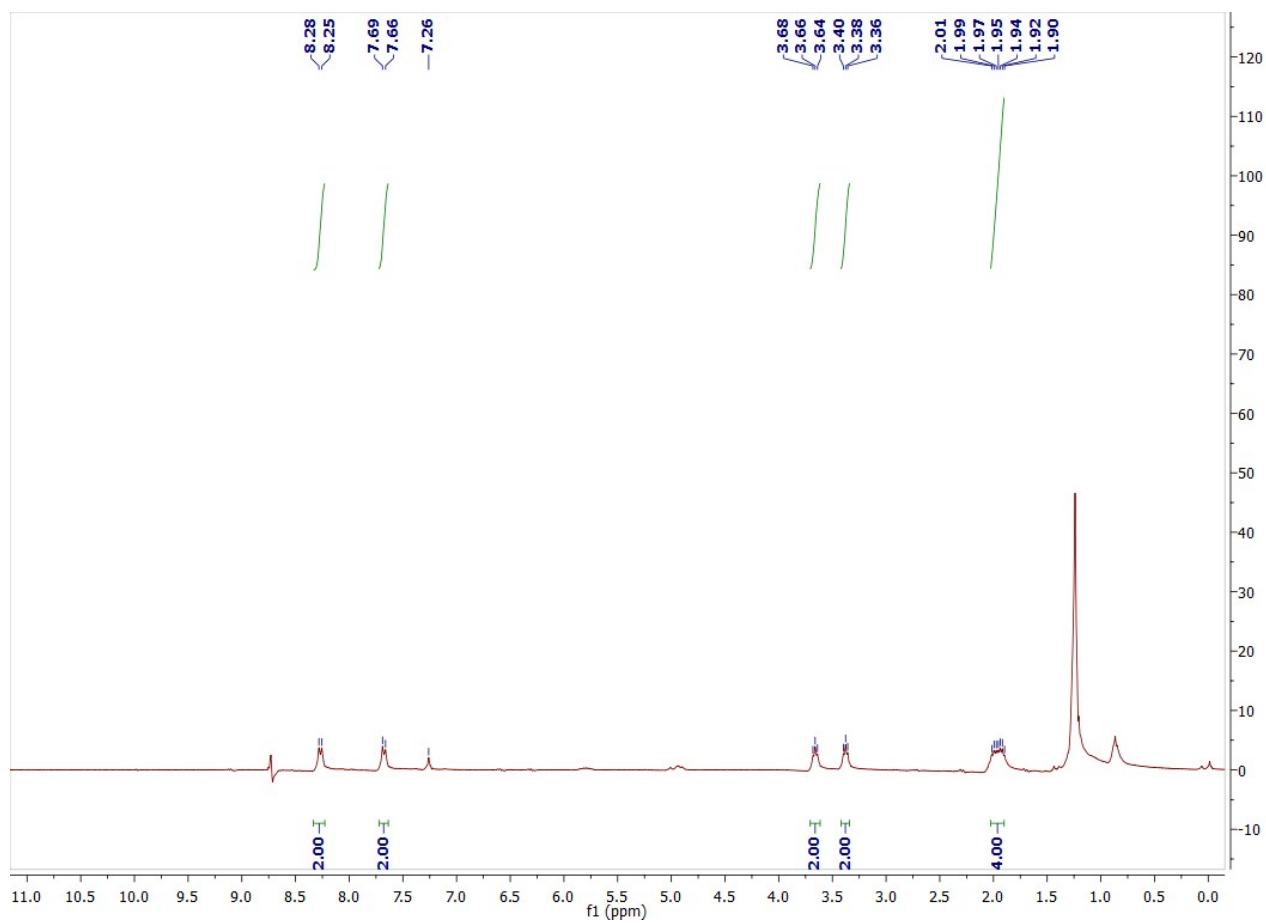

**Fig. S25** <sup>1</sup>H NMR (300 MHz, CDCl<sub>3</sub>) spectrum of **5a**.

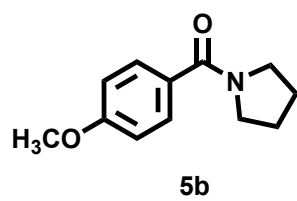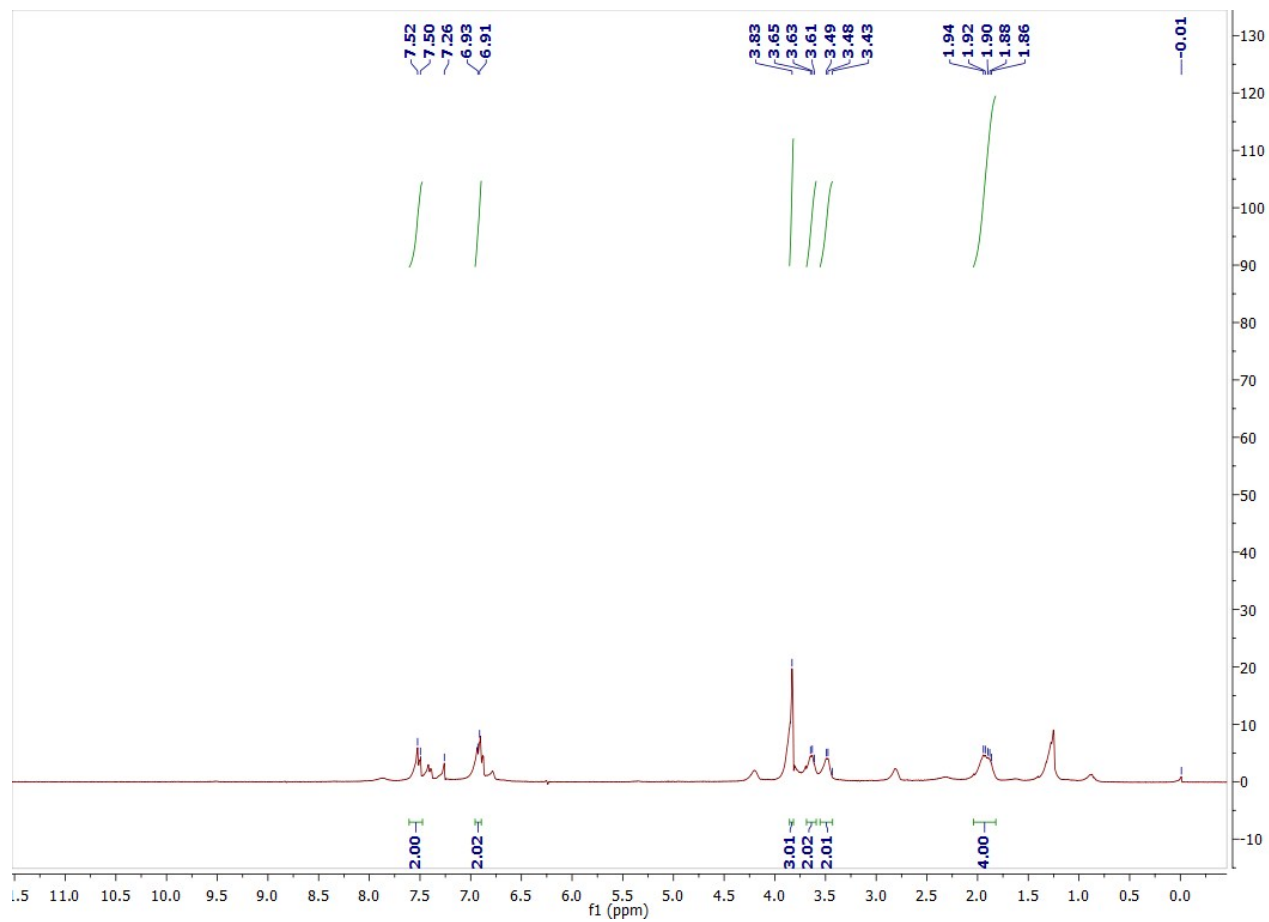

**Fig. S26** <sup>1</sup>H NMR (300 MHz, CDCl<sub>3</sub>) spectrum of **5b**.

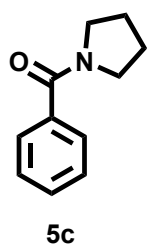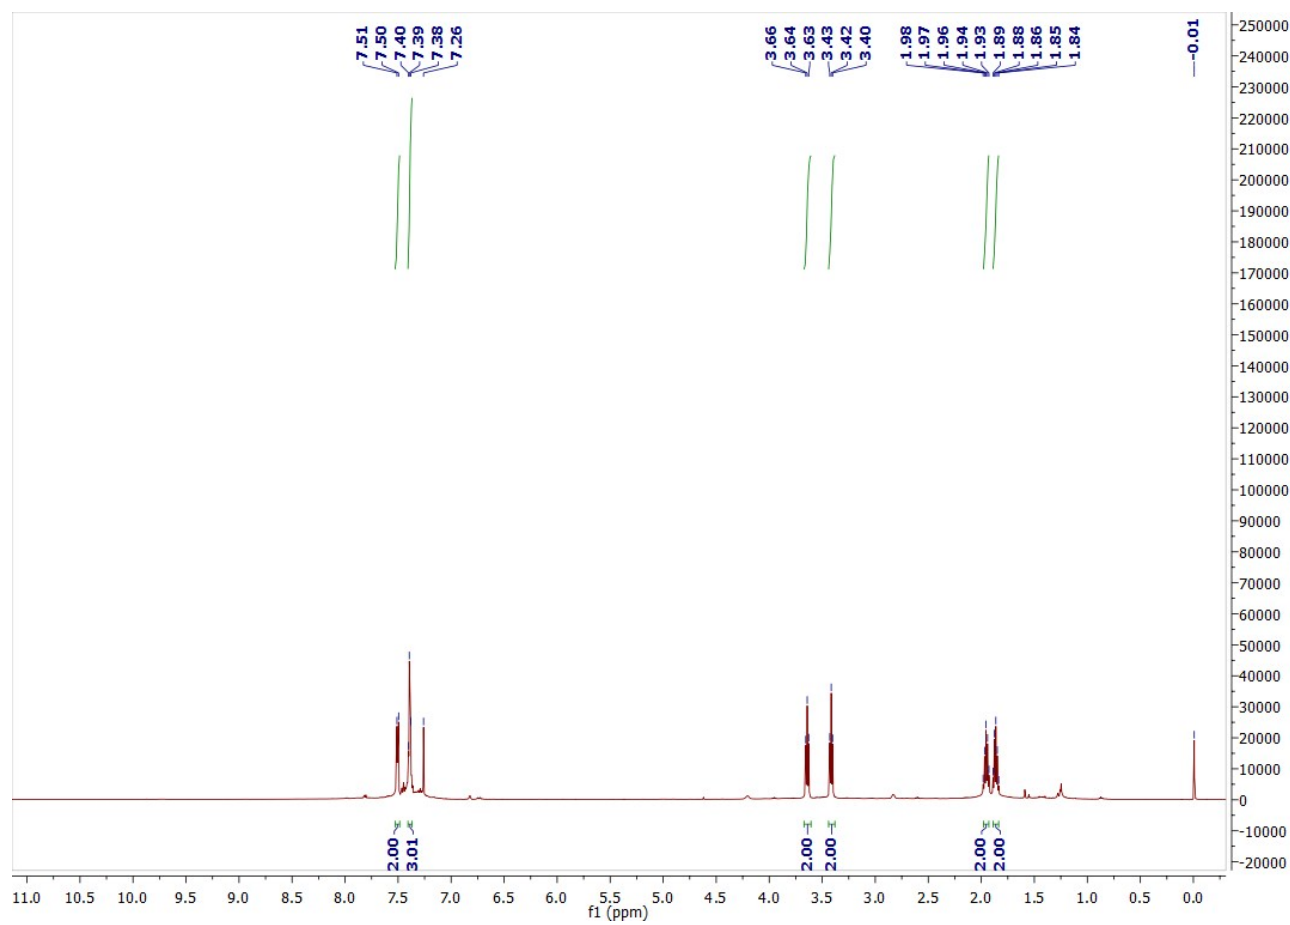

**Fig. S27**  $^1\text{H}$  NMR (500 MHz,  $\text{CDCl}_3$ ) spectrum of **5c**.

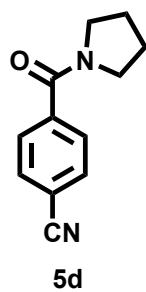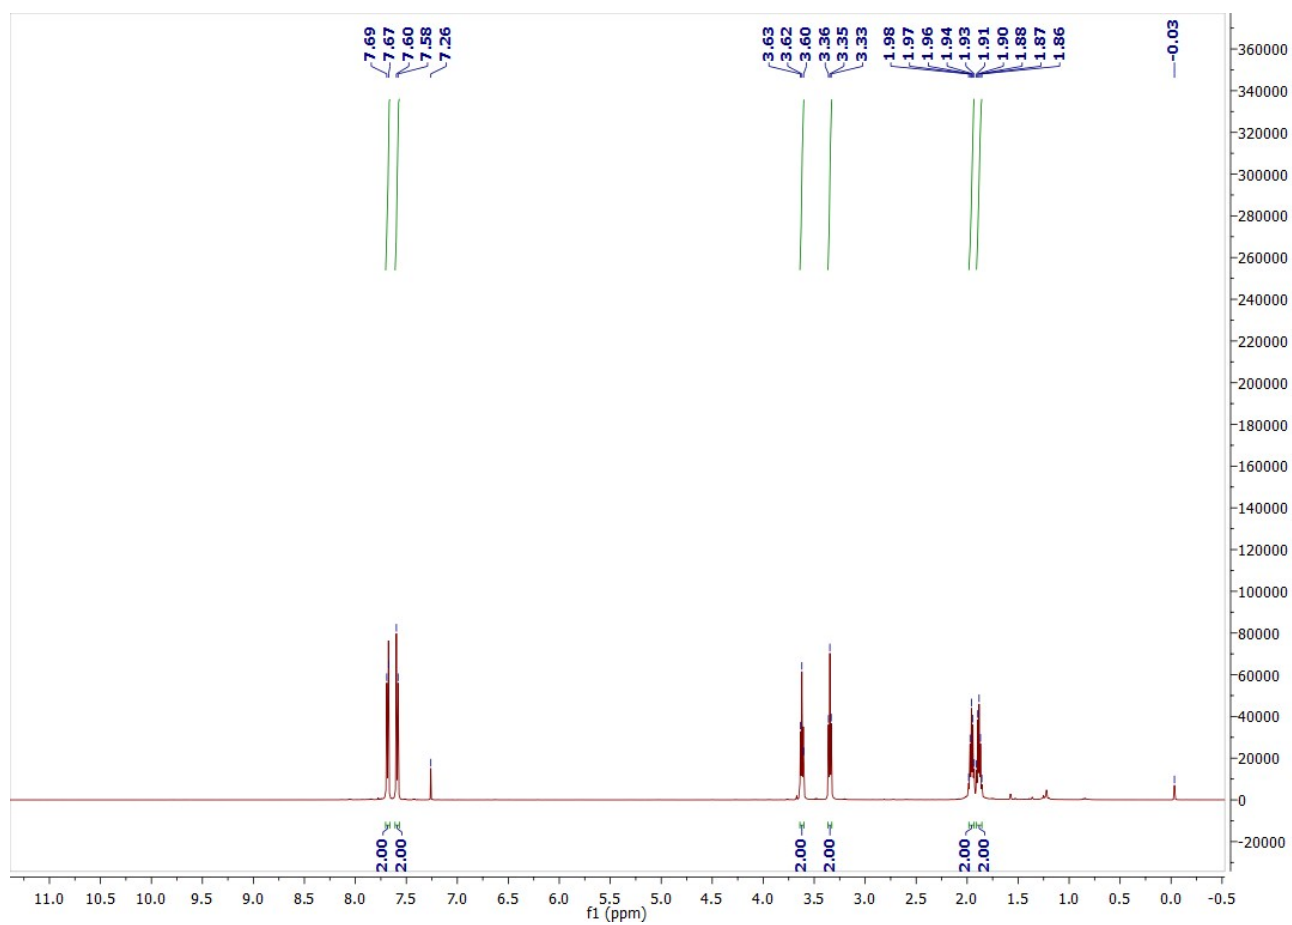

**Fig. S28** <sup>1</sup>H NMR (500 MHz, CDCl<sub>3</sub>) spectrum of **5d**.

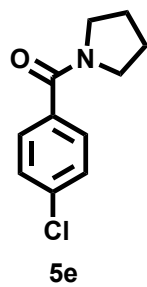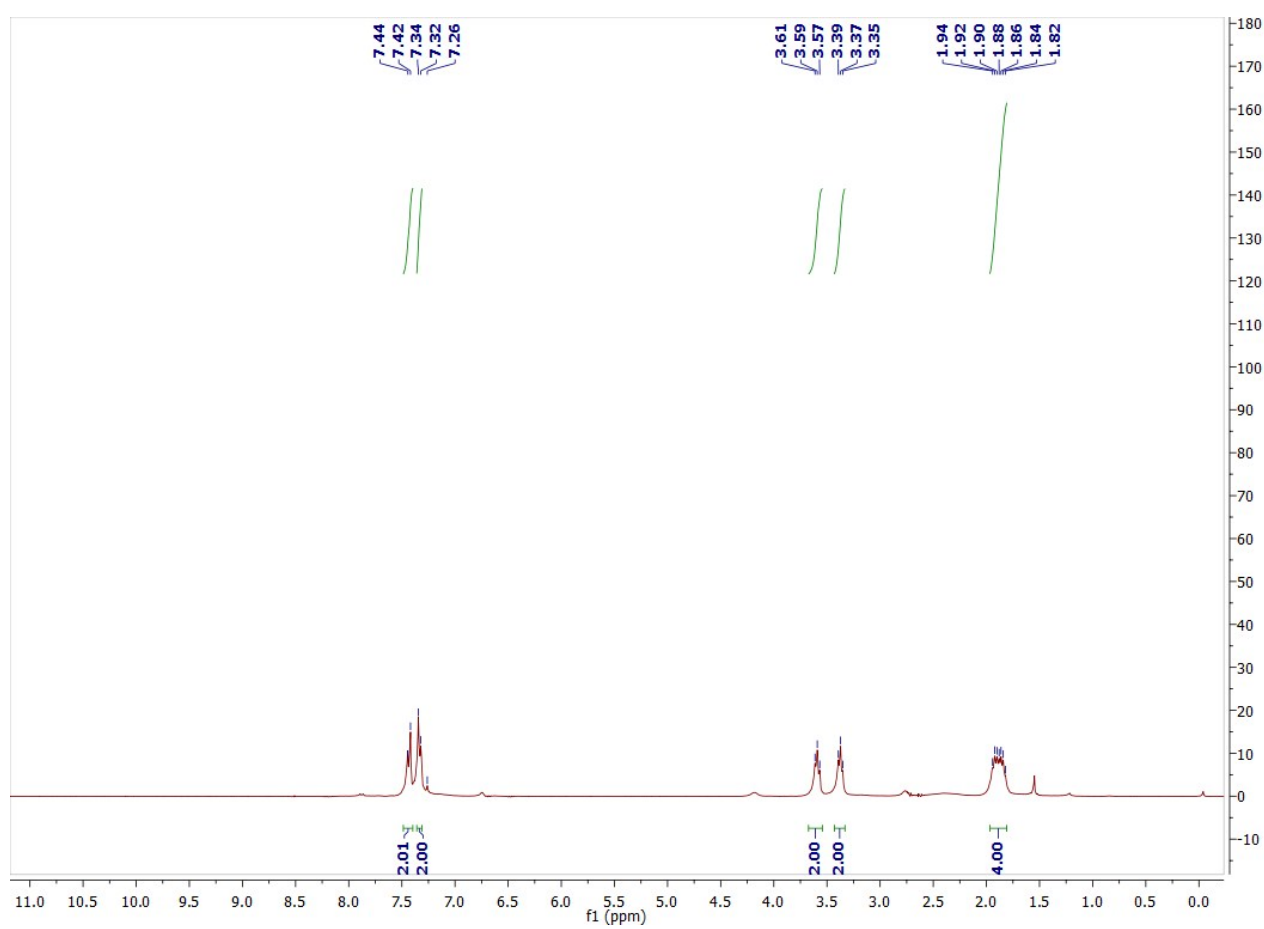

**Fig. S29** <sup>1</sup>H NMR (300 MHz, CDCl<sub>3</sub>) spectrum of **5e**.

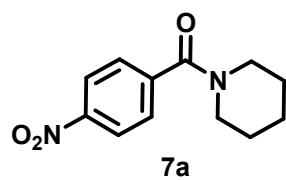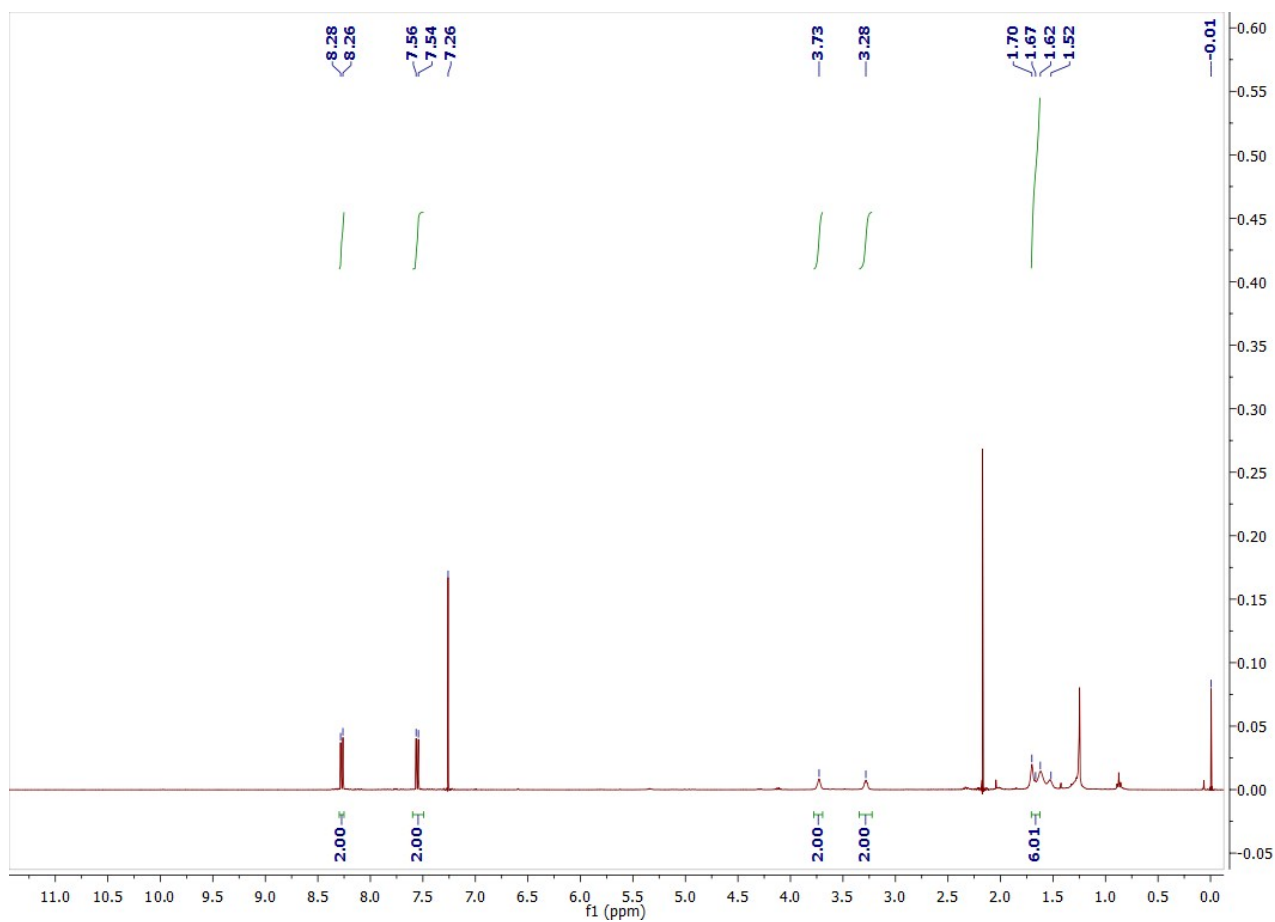

**Fig. S30** <sup>1</sup>H NMR (400 MHz, CDCl<sub>3</sub>) spectrum of **7a**.

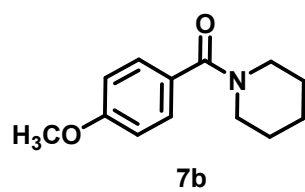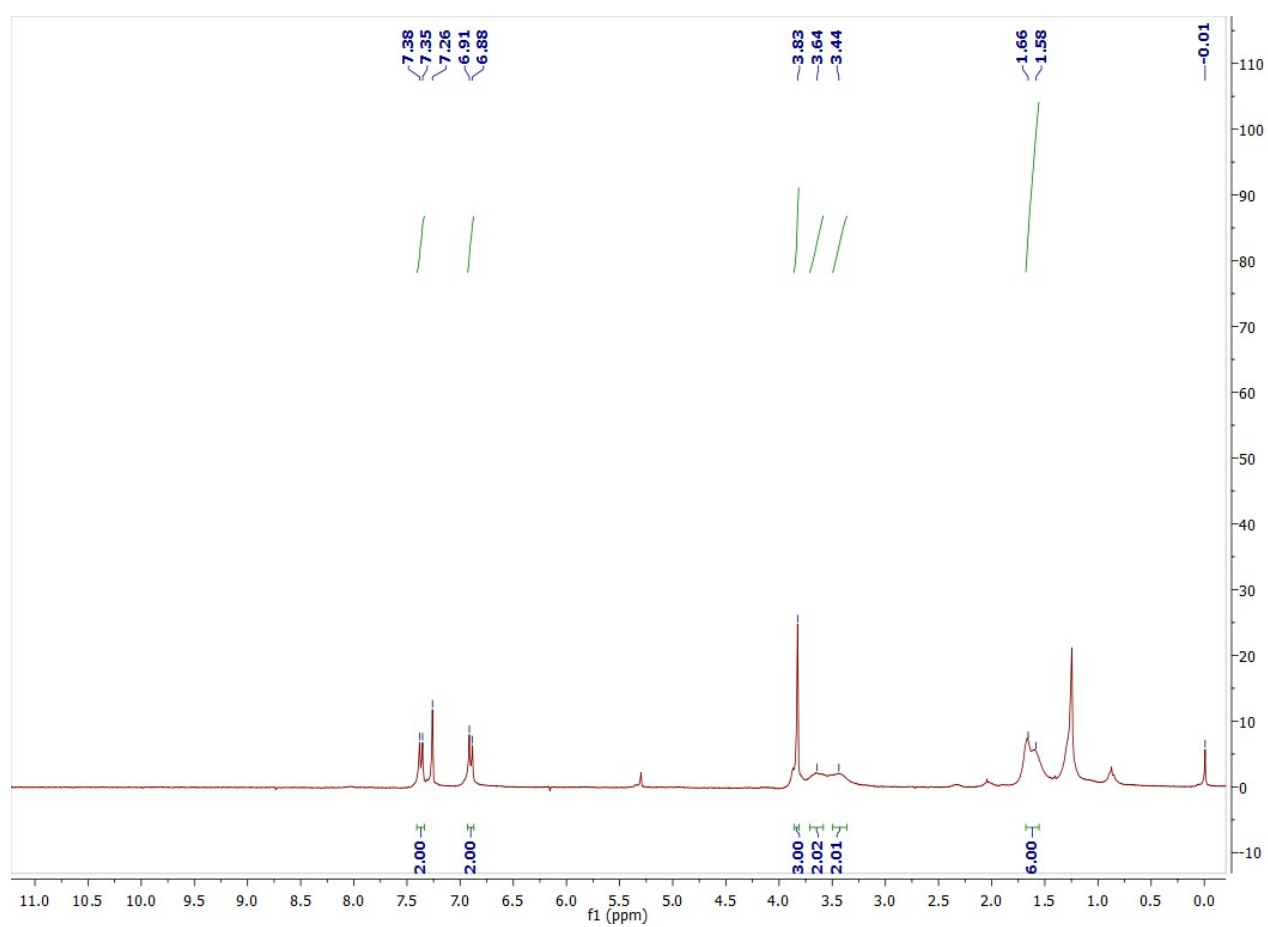

**Fig. S31**  $^1\text{H}$  NMR (300 MHz,  $\text{CDCl}_3$ ) spectrum of **7b**.



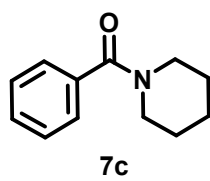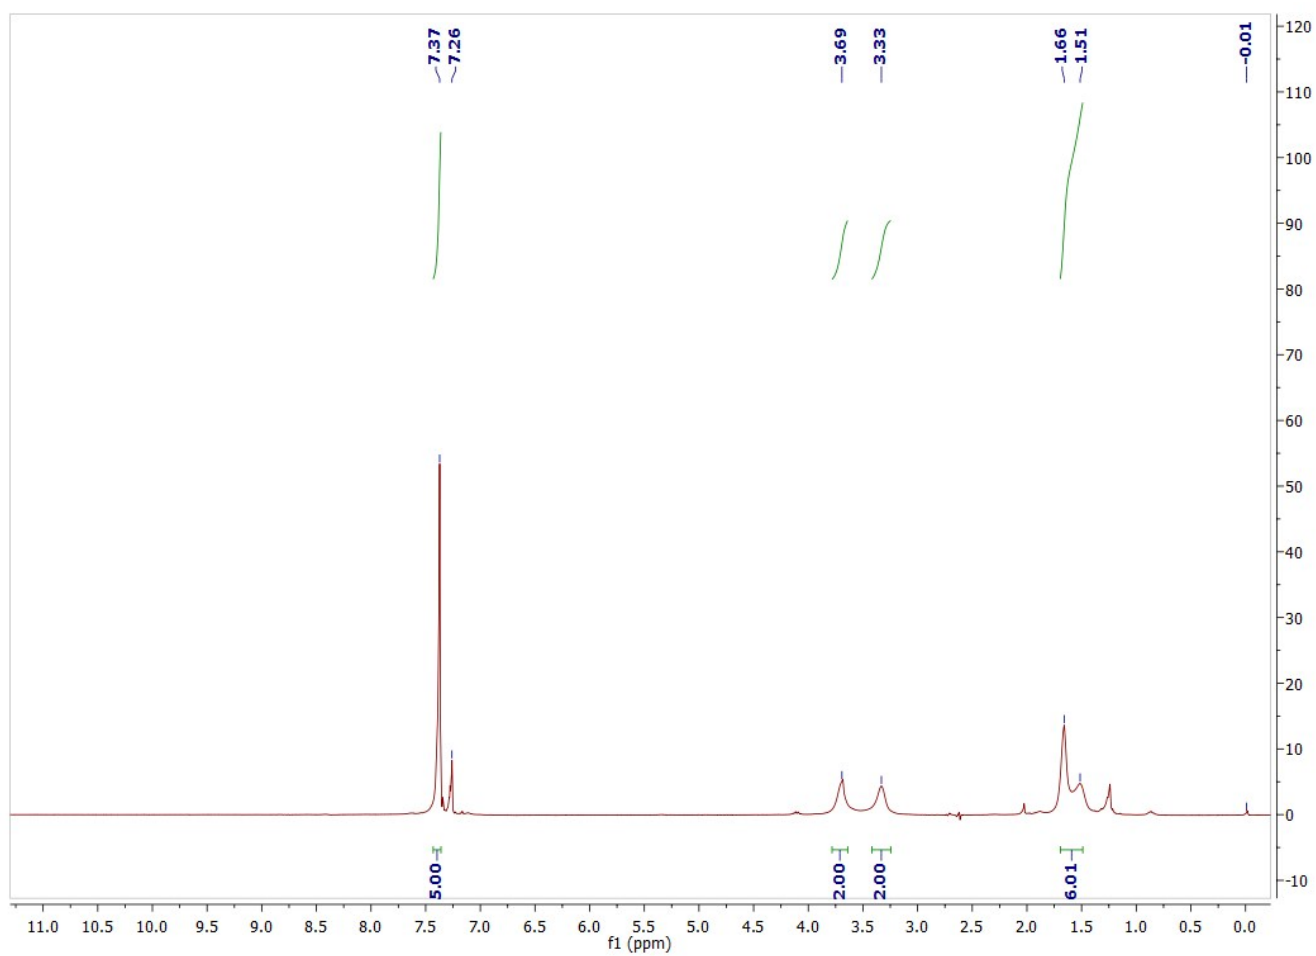

**Fig. S32** <sup>1</sup>H NMR (300 MHz, CDCl<sub>3</sub>) spectrum of **7c**.

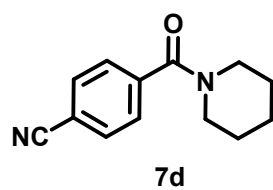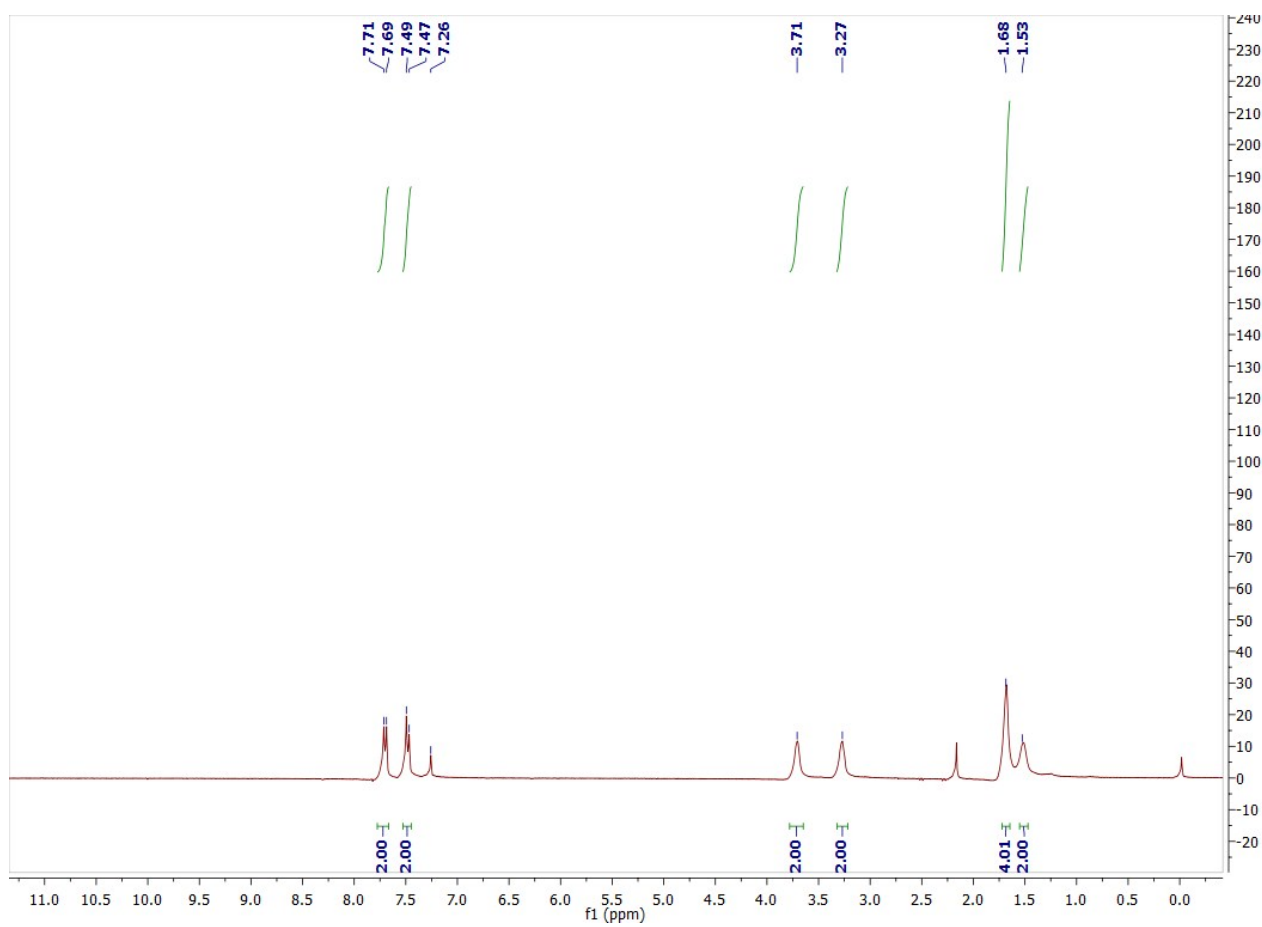

**Fig. S33** <sup>1</sup>H NMR (300 MHz, CDCl<sub>3</sub>) spectrum of **7d**.

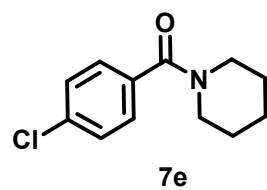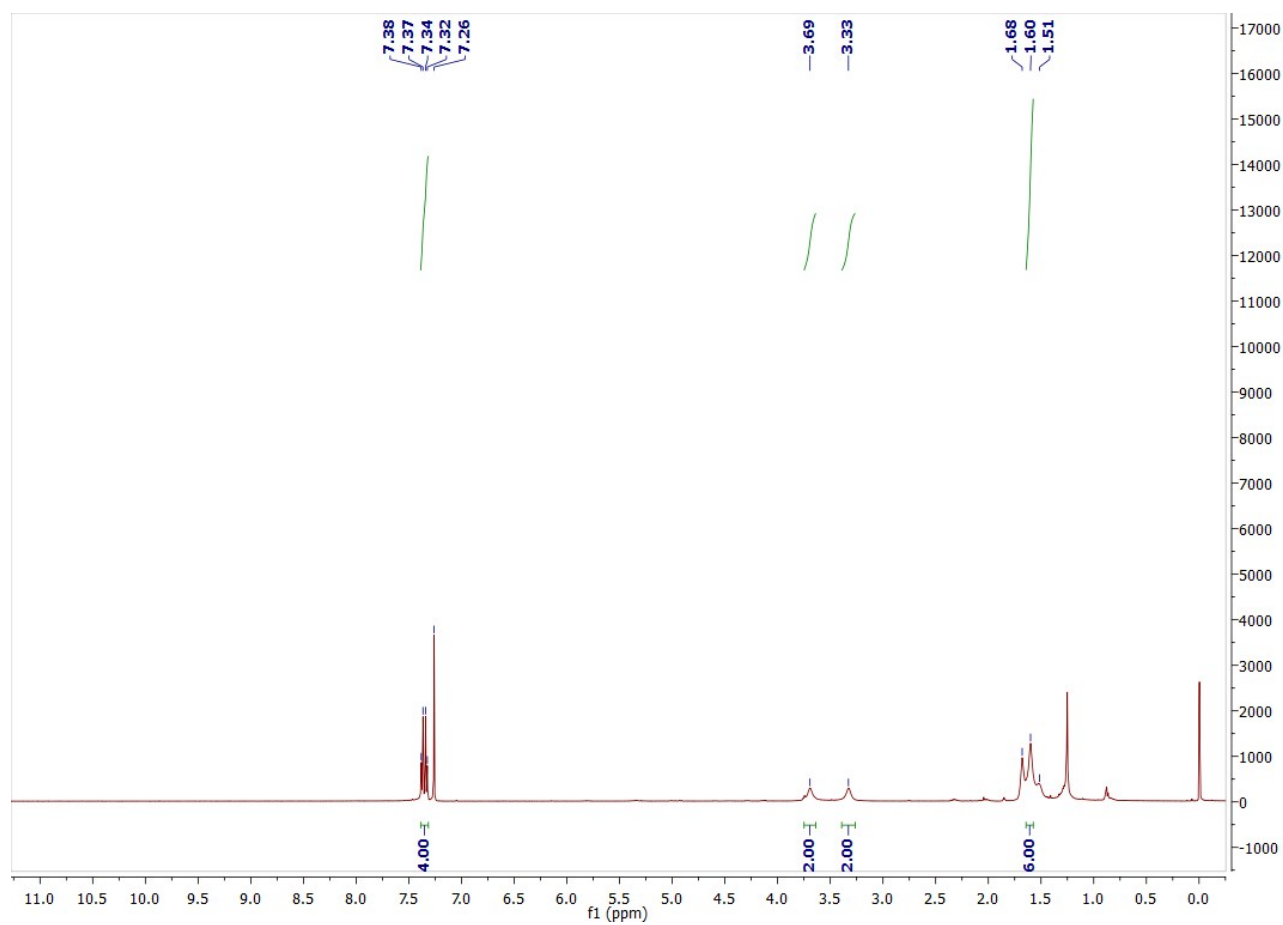

**Fig. S34** <sup>1</sup>H NMR (500 MHz, CDCl<sub>3</sub>) spectrum of **7e**.

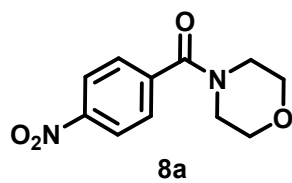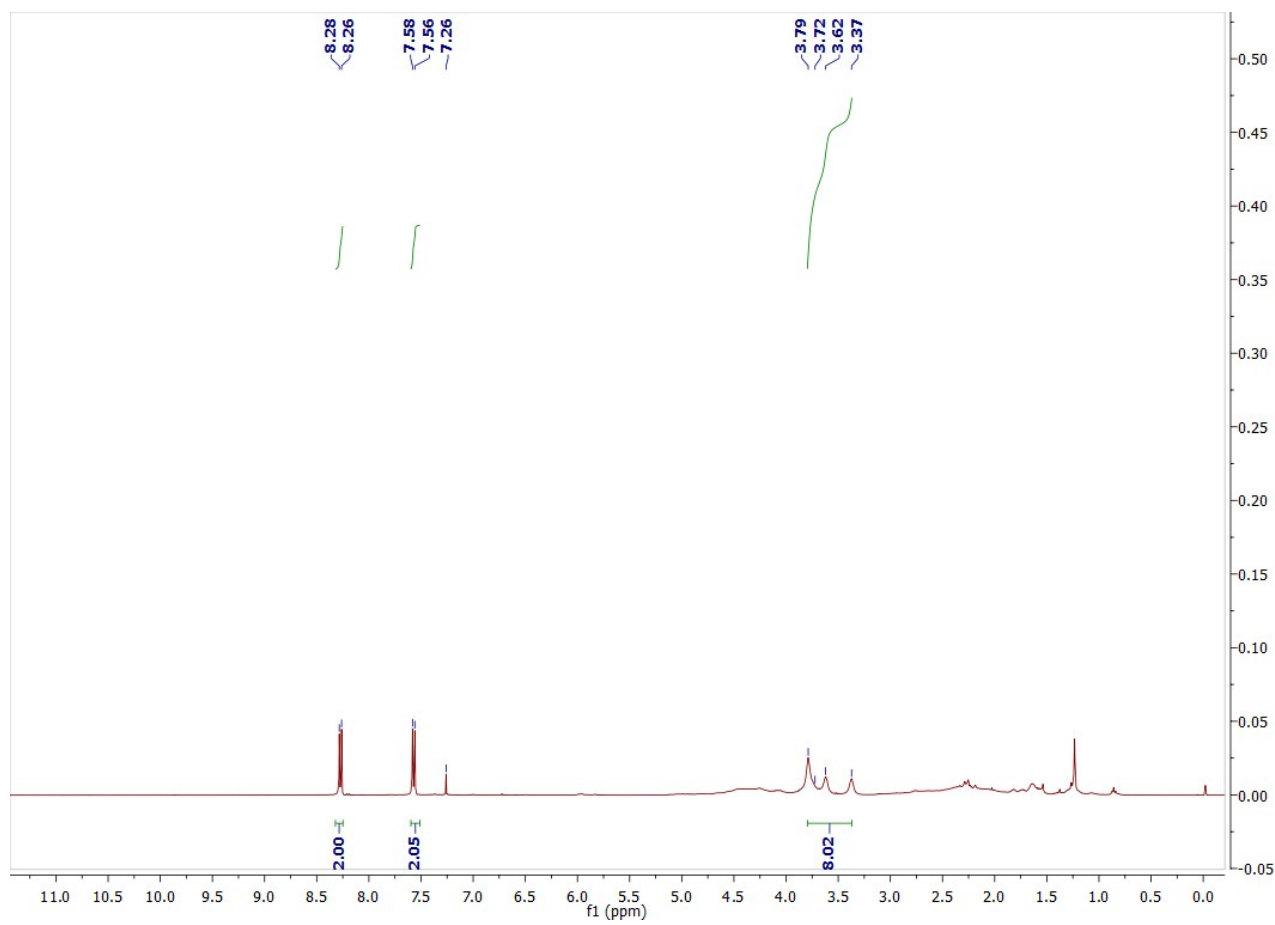

**Fig. S35** <sup>1</sup>H NMR (400 MHz, CDCl<sub>3</sub>) spectrum of **8a**.

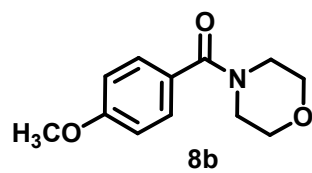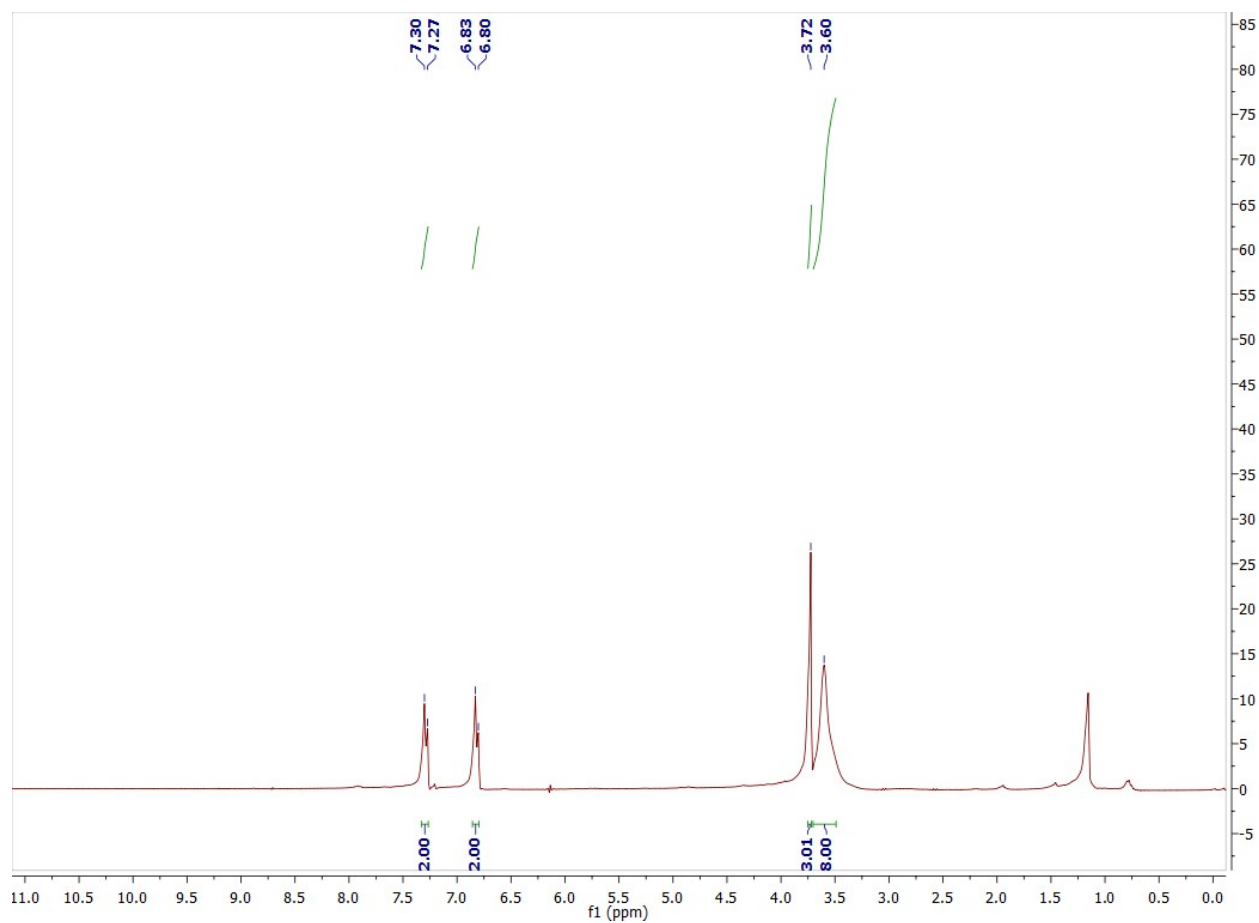

**Fig. S36** <sup>1</sup>H NMR (300 MHz, CDCl<sub>3</sub>) spectrum of **8b**.

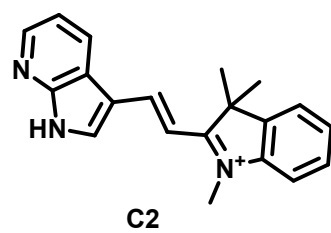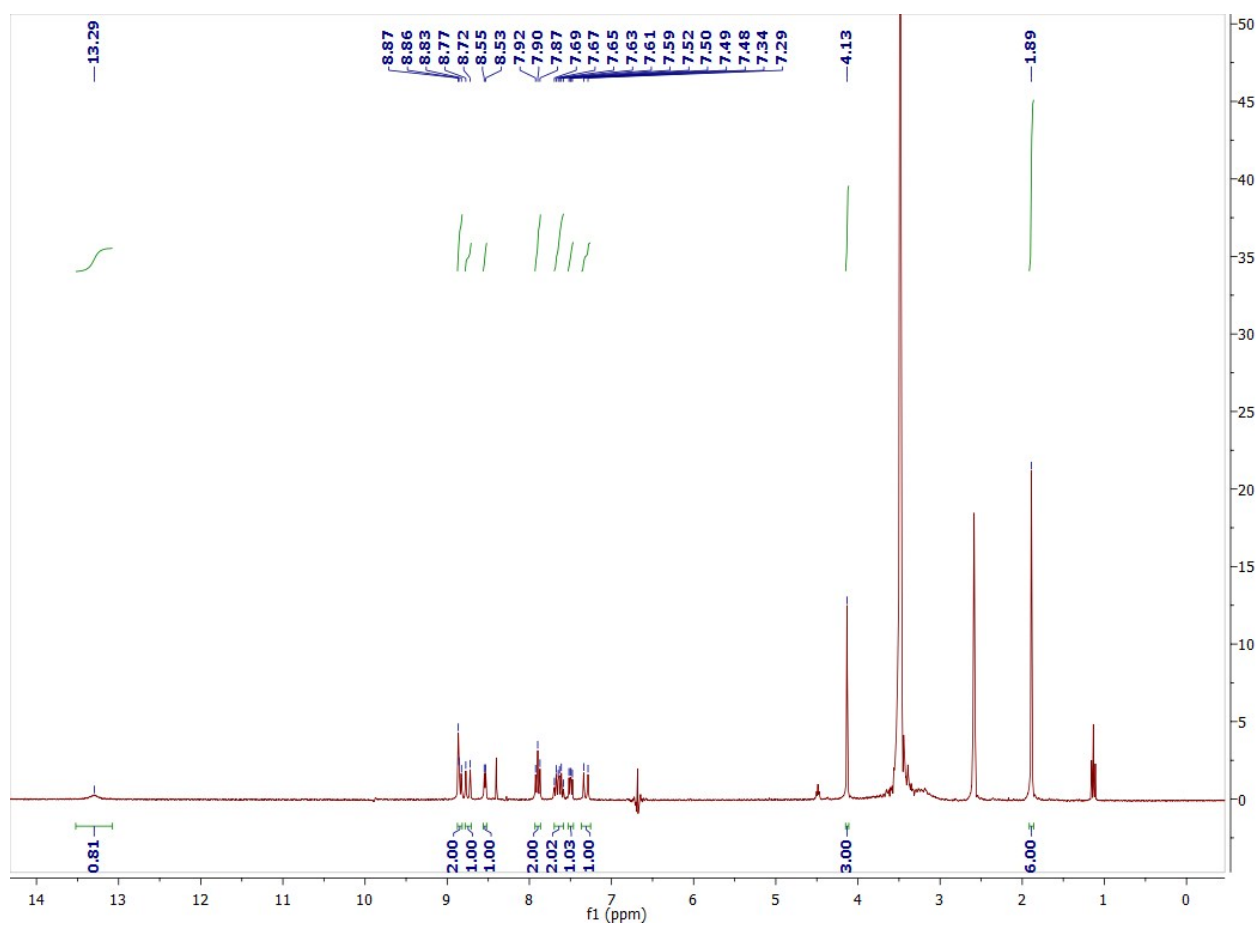

**Fig. S37** <sup>1</sup>H NMR (300 MHz, CDCl<sub>3</sub>) spectrum of **C2**.

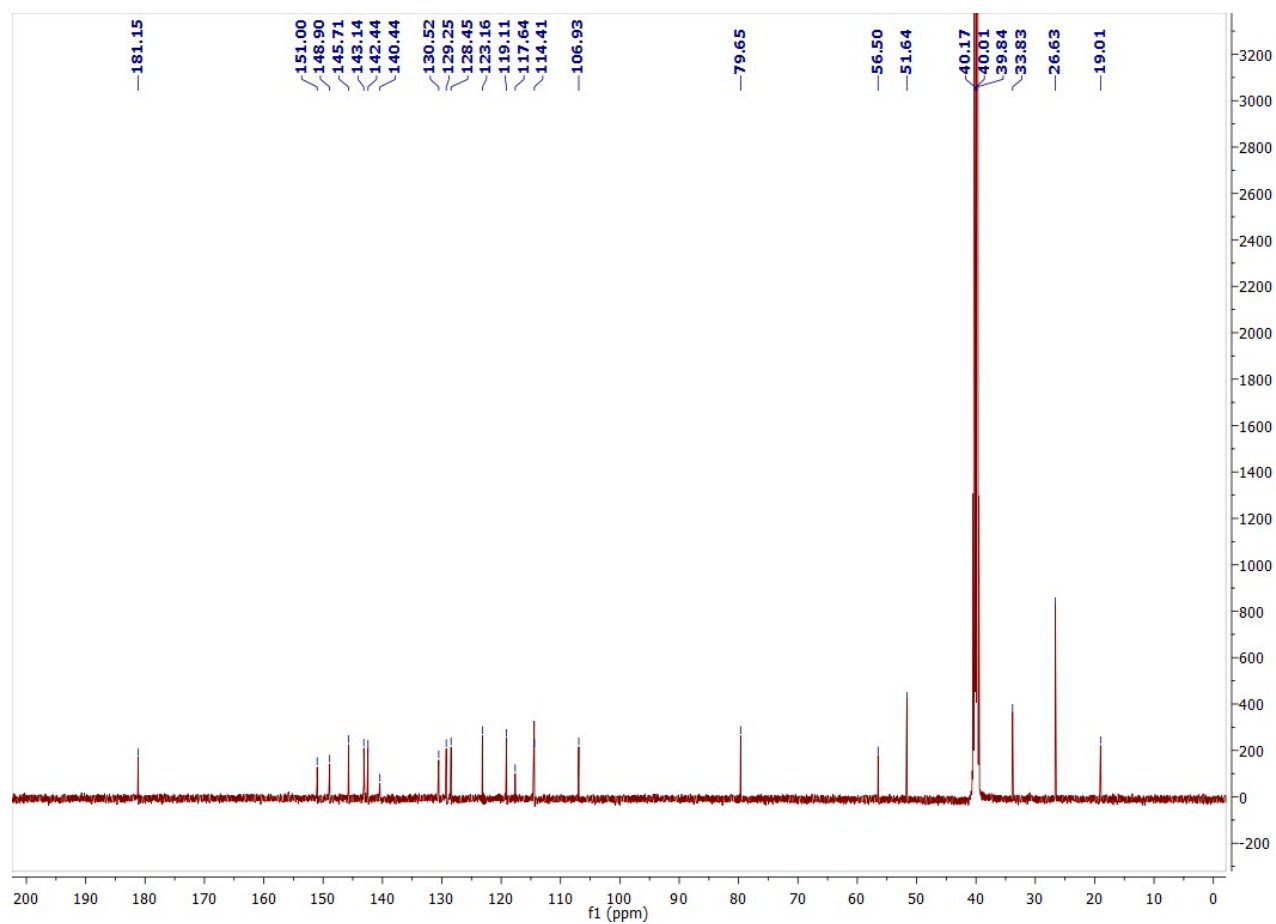

**Fig. S38**  $^{13}\text{C}$  NMR (500 MHz,  $\text{CDCl}_3$ ) spectrum of **C2**.

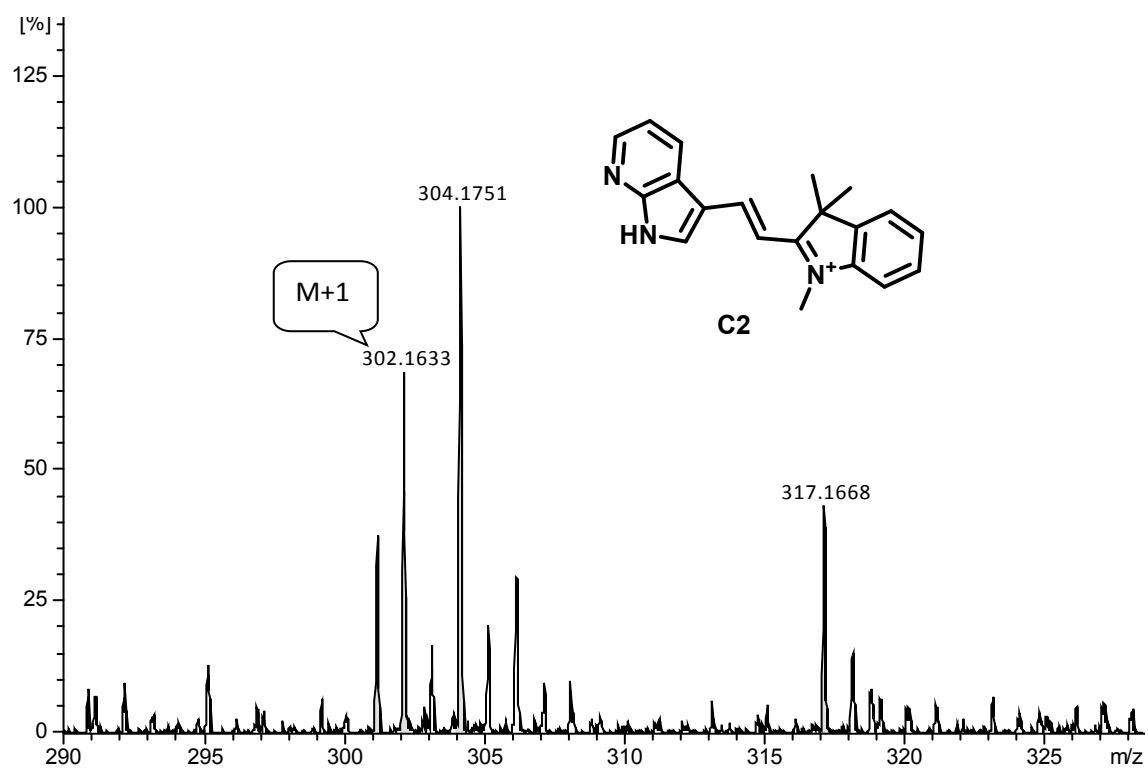

**Fig. S39** Mass spectrum of **C2**.



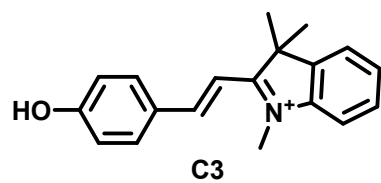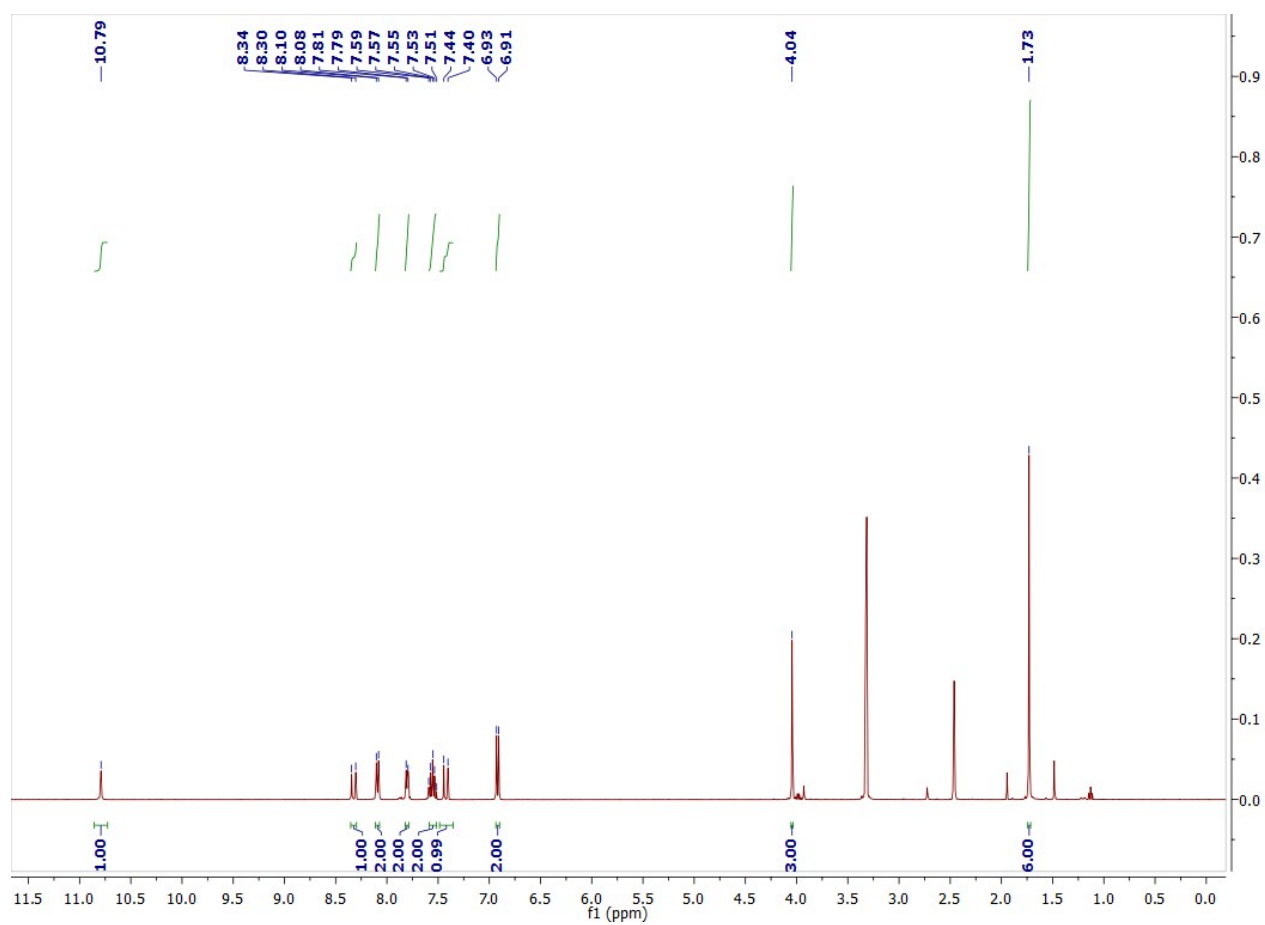

**Fig. S40**  $^1\text{H}$  NMR (400 MHz,  $\text{CDCl}_3$ ) spectrum of **C3**.

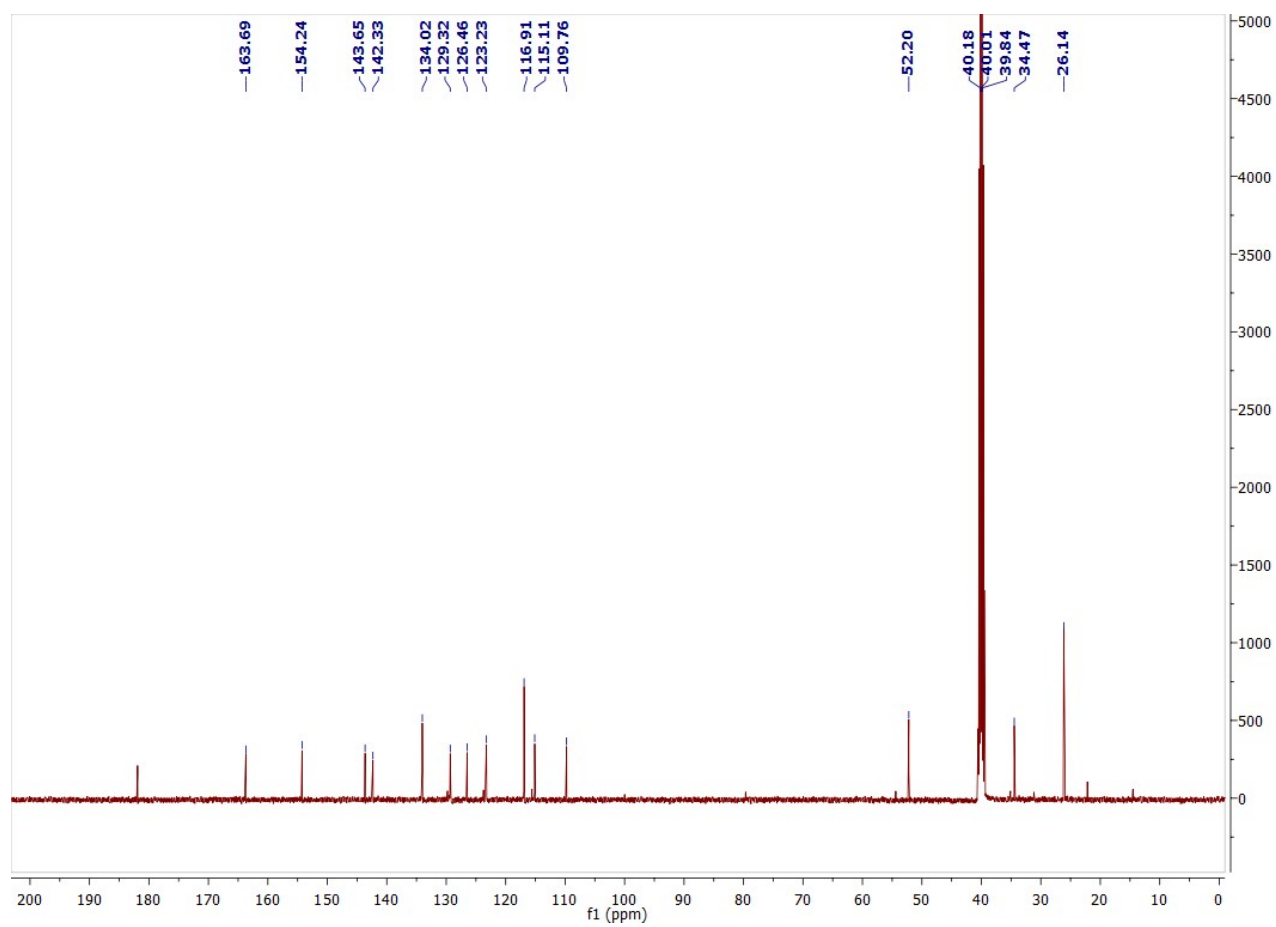

**Fig. S41**  $^{13}\text{C}$  NMR (500 MHz,  $\text{DMSO-}d_6$ ) spectrum of **C3**.

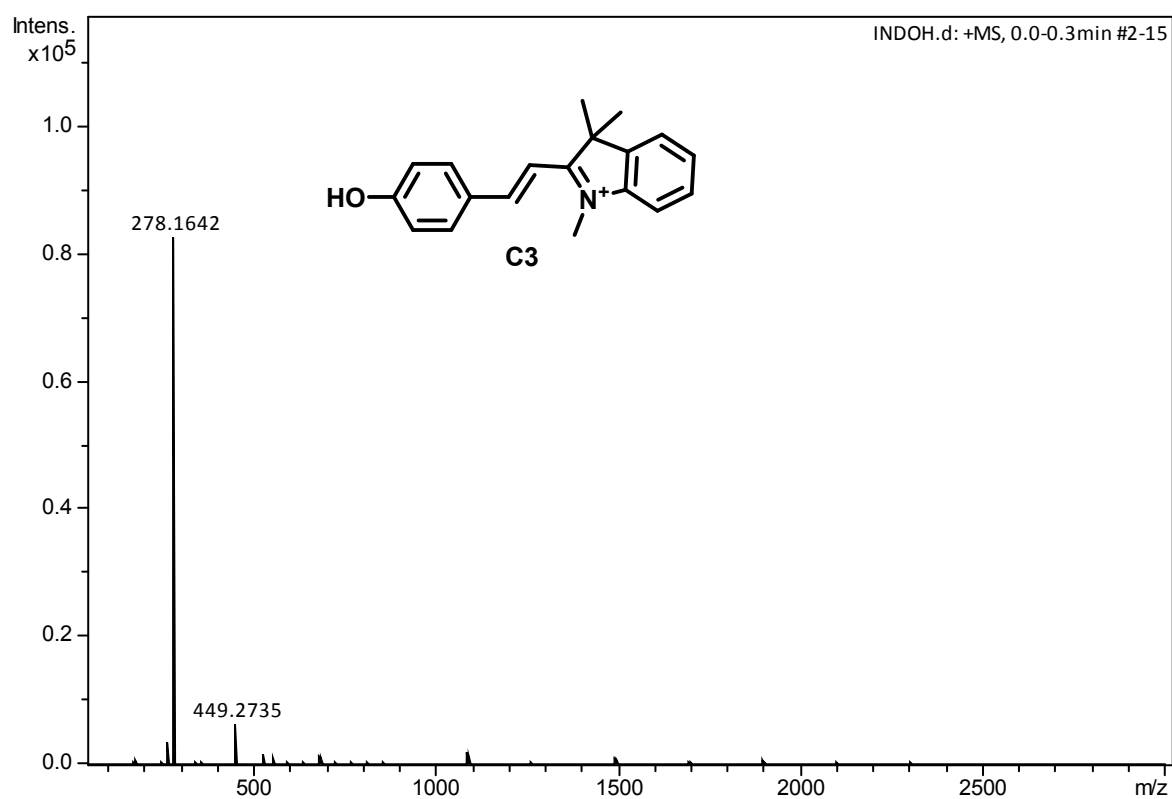

**Fig. S42** Mass spectrum of **C3**.

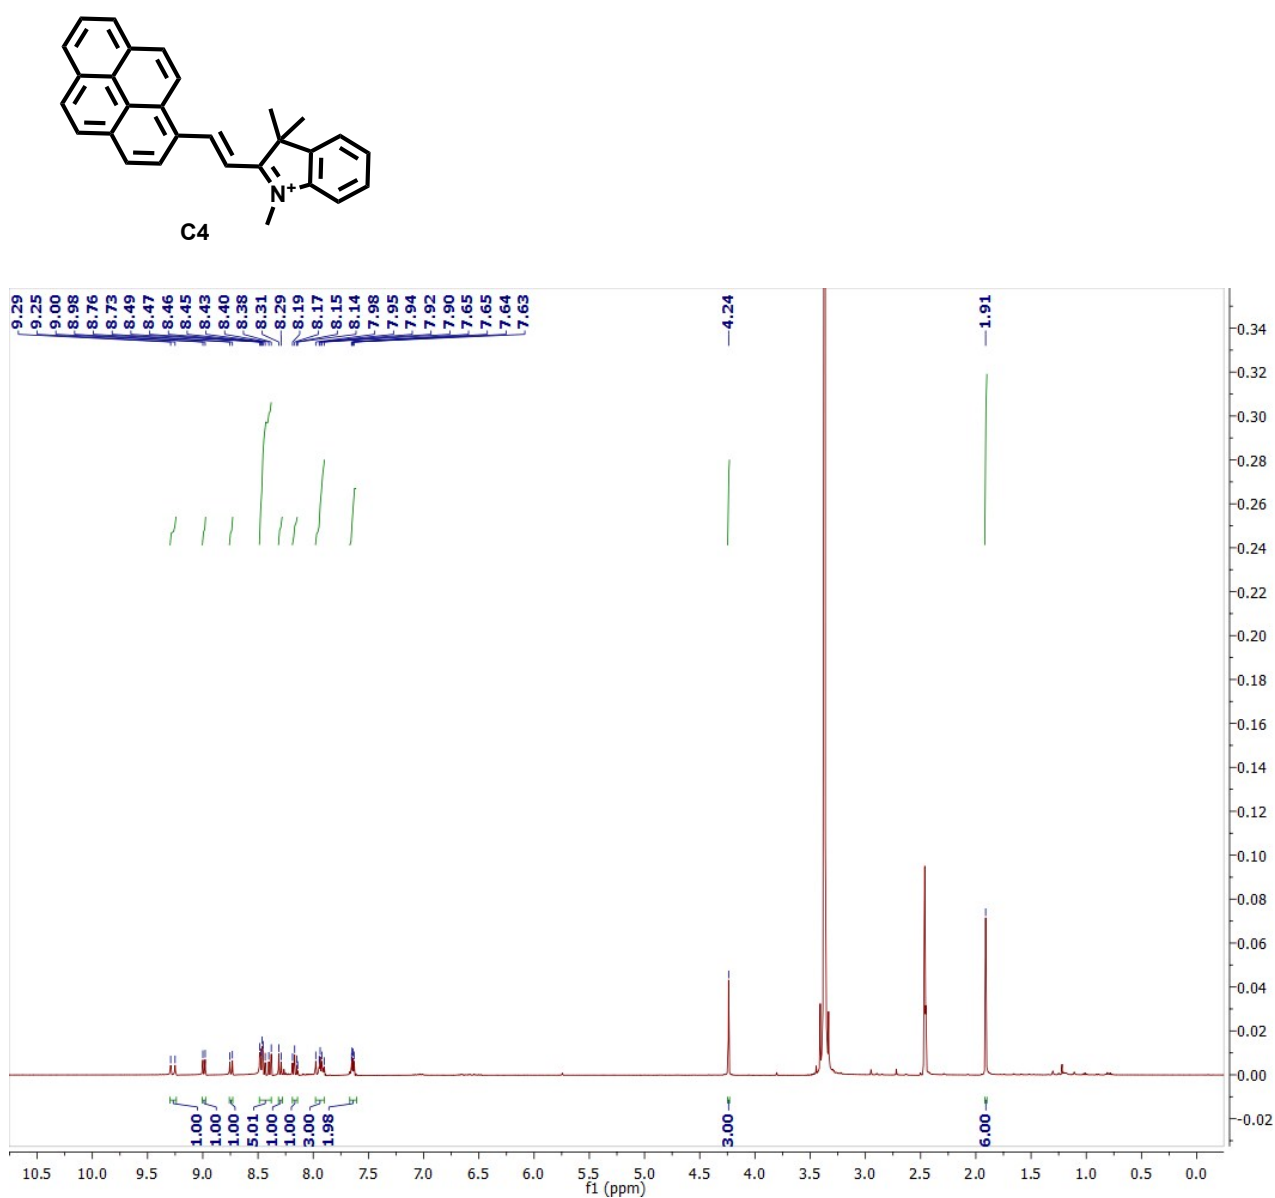

**Fig. S43** <sup>1</sup>H NMR (400 MHz, DMSO-*d*<sub>6</sub>) spectrum of C4.

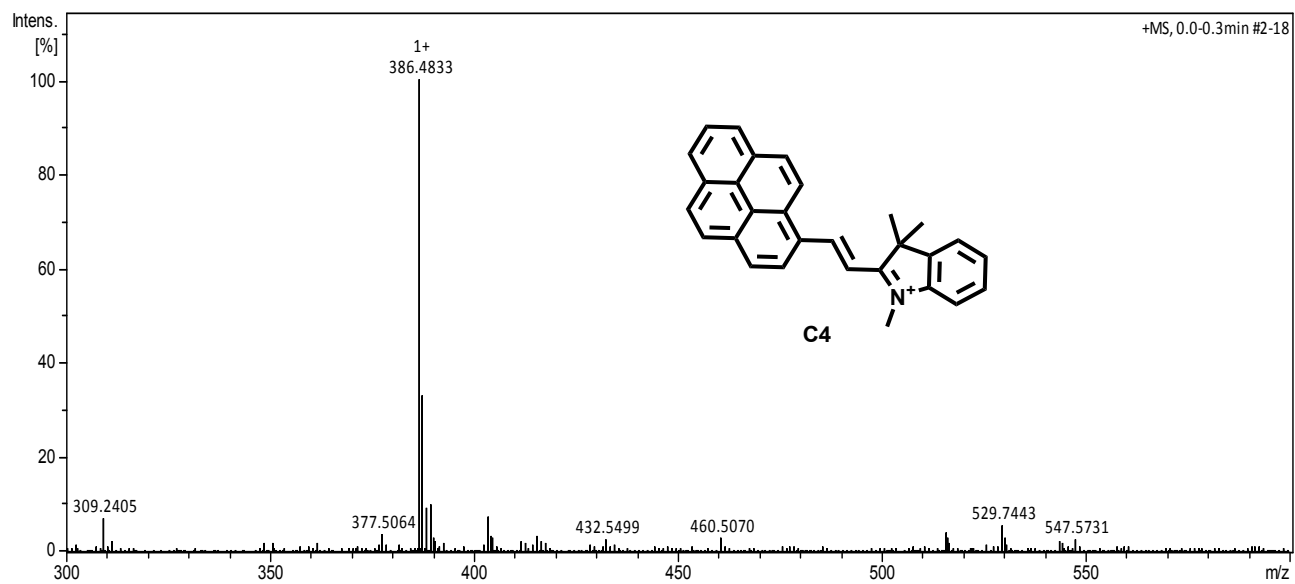

**Fig. S44** Mass spectrum of C4.
